# Supplementary material for: Diverse Protein Profiles in CNS Myeloid Cells and CNS Tissue From Lipopolysaccharide- and Vehicle-Injected APPSWE/PS1ΔE9 Transgenic Mice Implicate Cathepsin Z in Alzheimer’s Disease
Source: Front Cell Neurosci. 2018 Nov 6;12:397. doi: 10.3389/fncel.2018.00397 (PMC6232379; doi:10.3389/fncel.2018.00397)
Supplement: TABLE S4 — All quantified proteins in the CD11b+ cell proteome, significantly regulated proteins between Tg and C57BL/6 CD11b+ cells, and proteins overlapping between the CD11b+ cell proteome and the hippocampal proteome. [file Table_4.XLSX]

## Sheet: CD11b+ proteome
Accession	Description	Abundance Ratio: (TG) / (WT)	Abundance Ratio Adj. P-Value: (TG) / (WT)	Abundances (Grouped): WT	Abundances (Grouped): TG	Abundances (Grouped) CV [%]: WT	Abundances (Grouped) CV [%]: TG	Abundances (Normalized): F1: 114, Control, WT	Abundances (Normalized): F1: 115, Sample, WT	Abundances (Normalized): F1: 116, Sample, TG	Abundances (Normalized): F1: 117, Sample, TG	WT/WT
Q3TXU4	Apolipoprotein E, isoform CRA_h OS=Mus musculus GN=Apoe PE=1 SV=1	5.608	3.31909e-15	3071	17221.5	2.28	5.39	3120.8	3021.9	17890.5	16577.4	0.968309
P12023	Amyloid beta A4 protein OS=Mus musculus GN=App PE=1 SV=3	4.351	5.62976e-12	193.9	843.7	6.22	92.04	202.6	185.6	1834.5	388	0.916091
Q545I6	Cathepsin Z, isoform CRA_b OS=Mus musculus GN=Ctsz PE=1 SV=1	2.174	0.00258413	541.8	1177.8	20.93	6.12	466.7	628.9	1127.9	1229.8	1.34755
Q549A5	Clusterin OS=Mus musculus GN=Clu PE=1 SV=1	1.865	0.0328343	536.8	1001.3	20.05	18.82	619.1	465.4	1144.8	875.8	0.751736
P48036	Annexin A5 OS=Mus musculus GN=Anxa5 PE=1 SV=1	1.828	0.0424932	641.9	1173.2	11.41	7.66	695.9	592	1238.6	1111.2	0.850697
Q61414	Keratin, type I cytoskeletal 15 OS=Mus musculus GN=Krt15 PE=1 SV=2	1.568	0.216793	376.6	590.6	44.3	52.3	272.3	520.7	400.6	870.7	1.91223
P29351	Tyrosine-protein phosphatase non-receptor type 6 OS=Mus musculus GN=Ptpn6 PE=1 SV=2	1.552	0.244771	1036.3	1608.1	20.38	3.84	896.3	1198.1	1565	1652.5	1.33672
Q4KML7	Ezrin OS=Mus musculus GN=Ezr PE=1 SV=1	1.511	0.291839	215.4	325.4	4.25	53.42	222	209	218.7	484.2	0.941441
E9Q616	AHNAK nucleoprotein (desmoyokin) OS=Mus musculus GN=Ahnak PE=1 SV=1	1.506	0.291839	718.7	1082.1	10.48	66.8	774.1	667.3	647.8	1807.6	0.862033
P24452	Macrophage-capping protein OS=Mus musculus GN=Capg PE=1 SV=2	1.48	0.315842	336	497.2	0.83	1.58	338	334	502.8	491.7	0.988166
P48678	Prelamin-A/C OS=Mus musculus GN=Lmna PE=1 SV=2	1.445	0.40912	1079.1	1559.7	0.4	68.71	1082.1	1076.1	917.5	2651.6	0.994455
O54734	Dolichyl-diphosphooligosaccharide--protein glycosyltransferase 48 kDa subunit OS=Mus musculus GN=Ddost PE=1 SV=2	1.391	0.528854	254.6	354	14.92	0.98	229	283	351.6	356.5	1.23581
Q8R2Q0	Tripartite motif-containing protein 29 OS=Mus musculus GN=Trim29 PE=1 SV=1	1.382	0.528854	288.3	398.3	5.72	48.18	300.2	276.9	279.3	568	0.922385
Q91WJ8	Far upstream element-binding protein 1 OS=Mus musculus GN=Fubp1 PE=1 SV=1	1.379	0.528854	223.4	308	12.32	2.14	204.7	243.8	303.4	312.7	1.19101
Q9D964	Glycine amidinotransferase, mitochondrial OS=Mus musculus GN=Gatm PE=1 SV=1	1.366	0.542199	905.6	1237.5	34.15	45.04	707.9	1158.6	1721.3	889.7	1.63667
E9Q557	Desmoplakin OS=Mus musculus GN=Dsp PE=1 SV=1	1.34	0.614621	9004.6	12069.4	8.46	52.33	9560.6	8480.9	8184.4	17798.6	0.887068
O08585	Clathrin light chain A OS=Mus musculus GN=Clta PE=1 SV=2	1.318	0.670355	681.8	898.9	16.55	16.17	606.2	766.9	1008.3	801.3	1.26509
P17879	Heat shock 70 kDa protein 1B OS=Mus musculus GN=Hspa1b PE=1 SV=3	1.308	0.683048	313.9	410.7	2.62	51.89	319.8	308.2	279.5	603.5	0.963727
P50516	V-type proton ATPase catalytic subunit A OS=Mus musculus GN=Atp6v1a PE=1 SV=2	1.307	0.683048	285.7	373.4	17.14	0.74	252.9	322.7	375.4	371.5	1.276
Q9QXS1	Plectin OS=Mus musculus GN=Plec PE=1 SV=3	1.307	0.683048	556.6	727.4	5.37	60.42	578.1	535.8	460.8	1148.2	0.926829
Q99KK2	N-acylneuraminate cytidylyltransferase OS=Mus musculus GN=Cmas PE=1 SV=2	1.302	0.685972	183.5	238.9	0.9	31.95	184.7	182.4	189.8	300.6	0.987547
Q9D8E6	60S ribosomal protein L4 OS=Mus musculus GN=Rpl4 PE=1 SV=3	1.281	0.726259	295.9	379	9.3	13.27	316.1	277.1	416.4	344.9	0.876621
Q91VW3	SH3 domain-binding glutamic acid-rich-like protein 3 OS=Mus musculus GN=Sh3bgrl3 PE=1 SV=1	1.279	0.728948	2037.6	2606.4	31.96	13.37	1619	2564.4	2865.7	2370.6	1.58394
P97350	Plakophilin-1 OS=Mus musculus GN=Pkp1 PE=1 SV=1	1.275	0.742145	1412.7	1801.4	0.64	39.5	1406.3	1419.1	1352	2400.1	1.0091
Q80X90	Filamin-B OS=Mus musculus GN=Flnb PE=1 SV=3	1.261	0.783849	77	97.1	10.77	52.1	83.1	71.4	66	143	0.859206
Q9JHR7	Insulin-degrading enzyme OS=Mus musculus GN=Ide PE=1 SV=1	1.251	0.812395	300.1	375.4	9.96	53.8	322.1	279.7	251.5	560.4	0.868364
Q3UV17	Keratin, type II cytoskeletal 2 oral OS=Mus musculus GN=Krt76 PE=1 SV=1	1.241	0.84077	16684.5	20699.2	20.71	37.11	19335.8	14396.8	15821.8	27080.3	0.744567
Q9CVB6	Actin-related protein 2/3 complex subunit 2 OS=Mus musculus GN=Arpc2 PE=1 SV=3	1.24	0.84077	436.3	540.9	2.4	13	443.8	429	593.1	493.3	0.966652
Q9ES97	Reticulon-3 OS=Mus musculus GN=Rtn3 PE=1 SV=2	1.233	0.850707	318.4	392.5	3.44	51.73	326.3	310.8	267.5	576	0.952498
Q3TXR9	Beta-hexosaminidase OS=Mus musculus GN=Hexb PE=1 SV=1	1.228	0.872904	497.9	611.5	14.4	44.29	449.6	551.5	845.5	442.2	1.22665
Q9WVA4	Transgelin-2 OS=Mus musculus GN=Tagln2 PE=1 SV=4	1.225	0.879125	389.7	477.3	5.87	2.77	406.2	373.8	486.8	468.1	0.920236
P43276	Histone H1.5 OS=Mus musculus GN=Hist1h1b PE=1 SV=2	1.223	0.879125	398.5	487.5	2.07	31.88	404.4	392.7	387.6	613.2	0.971068
Q02257	Junction plakoglobin OS=Mus musculus GN=Jup PE=1 SV=3	1.222	0.879125	7400.1	9040.2	13.73	42.32	8157	6713.4	6639.1	12309.6	0.823023
P05201	Aspartate aminotransferase, cytoplasmic OS=Mus musculus GN=Got1 PE=1 SV=3	1.217	0.889351	1012.7	1232.4	5.45	8.03	1052.5	974.4	1304.4	1164.3	0.925796
P97429	Annexin A4 OS=Mus musculus GN=Anxa4 PE=1 SV=4	1.213	0.89977	380	460.8	3.99	21.29	369.5	390.9	536.3	396	1.05792
Q543N3	LIM and SH3 protein 1, isoform CRA_b OS=Mus musculus GN=Lasp1 PE=1 SV=1	1.21	0.90289	402.8	487.4	27.11	9.6	331.7	489.1	455.4	521.7	1.47453
Q3U7Z6	Phosphoglycerate mutase OS=Mus musculus GN=Pgam1 PE=1 SV=1	1.203	0.919464	341	410.3	2.17	4.68	335.8	346.2	396.9	424.1	1.03097
P54728	UV excision repair protein RAD23 homolog B OS=Mus musculus GN=Rad23b PE=1 SV=2	1.202	0.919464	242.9	291.8	0.94	11.39	241.2	244.5	269.2	316.4	1.01368
E9Q0F0	Keratin 78 OS=Mus musculus GN=Krt78 PE=1 SV=1	1.202	0.919464	15978.4	19198.8	16.54	41.01	17970	14207.5	14243	25879	0.790623
Q8K4L4	Protein POF1B OS=Mus musculus GN=Pof1b PE=2 SV=3	1.201	0.919464	317.7	381.6	1.33	47.59	320.7	314.7	268.9	541.7	0.981291
P52480	Pyruvate kinase PKM OS=Mus musculus GN=Pkm PE=1 SV=4	1.2	0.919464	4603.2	5523.1	2.75	27.71	4693.7	4514.5	6736.1	4528.5	0.961821
Q0PD67	RAB1, member RAS oncogene family, isoform CRA_a OS=Mus musculus GN=Rab1a PE=1 SV=1	1.194	0.935896	162	193.4	6.58	6.16	154.6	169.7	185.2	202.1	1.09767
Q5I0T8	Ribosomal protein L19 OS=Mus musculus GN=Rpl19 PE=1 SV=1	1.193	0.935896	162.9	194.2	0.69	34.05	163.7	162.1	248.3	151.9	0.990226
Q9Z1R2	Large proline-rich protein BAG6 OS=Mus musculus GN=Bag6 PE=1 SV=1	1.19	0.935896	59.2	70.5	4.37	19.12	61	57.4	61.5	80.7	0.940984
Q58E64	Elongation factor 1-alpha OS=Mus musculus GN=Eef1a1 PE=1 SV=1	1.185	0.935896	3609.3	4278.1	7.05	7.02	3433.6	3793.9	4495.9	4070.8	1.10493
P49722	Proteasome subunit alpha type-2 OS=Mus musculus GN=Psma2 PE=1 SV=3	1.183	0.935896	299.5	354.3	3.64	36.01	307.3	291.9	273.1	459.7	0.949886
P14733	Lamin-B1 OS=Mus musculus GN=Lmnb1 PE=1 SV=3	1.18	0.935896	863.3	1018.7	28.14	10.24	705.7	1056.2	947.4	1095.4	1.49667
Q9QWL7	Keratin, type I cytoskeletal 17 OS=Mus musculus GN=Krt17 PE=1 SV=3	1.177	0.949419	4114.9	4842	4.41	6.73	3988.5	4245.3	4616.8	5078.3	1.06439
P46471	26S proteasome regulatory subunit 7 OS=Mus musculus GN=Psmc2 PE=1 SV=5	1.169	0.965527	173.4	202.7	1.83	5.02	175.7	171.2	210	195.6	0.974388
P70168	Importin subunit beta-1 OS=Mus musculus GN=Kpnb1 PE=1 SV=2	1.168	0.965527	610.6	713.4	6.35	20.14	583.8	638.7	618.1	823.3	1.09404
P70670	Nascent polypeptide-associated complex subunit alpha, muscle-specific form OS=Mus musculus GN=Naca PE=1 SV=2	1.166	0.965562	96	111.9	12.28	41.19	88	104.7	82.9	151	1.18977
P08730	Keratin, type I cytoskeletal 13 OS=Mus musculus GN=Krt13 PE=1 SV=2	1.163	0.977269	4571.7	5315.9	1.47	34.56	4524.5	4619.5	4142.5	6821.7	1.021
O35143	ATPase inhibitor, mitochondrial OS=Mus musculus GN=Atpif1 PE=1 SV=2	1.158	0.987753	535.4	620	27.2	52.52	440.7	650.6	915.8	419.8	1.47629
Q149Z9	Histone cluster 1, H1d OS=Mus musculus GN=Hist1h1d PE=1 SV=1	1.155	0.997935	1343.2	1550.7	3.37	19.2	1375.6	1311.6	1352.7	1777.8	0.953475
Q60605	Myosin light polypeptide 6 OS=Mus musculus GN=Myl6 PE=1 SV=3	1.153	0.997935	245.5	283.2	4.44	3.28	238	253.4	276.7	289.8	1.06471
Q3UHK5	Sodium/potassium-transporting ATPase subunit alpha OS=Mus musculus GN=Atp1a2 PE=1 SV=1	1.151	0.997935	425	489	20.76	10.02	366.6	492.8	455.5	525	1.34424
O08599	Syntaxin-binding protein 1 OS=Mus musculus GN=Stxbp1 PE=1 SV=2	1.151	0.997935	288.2	331.6	1.72	13.24	284.7	291.7	364.2	301.8	1.02459
P14824	Annexin A6 OS=Mus musculus GN=Anxa6 PE=1 SV=3	1.149	0.99883	287.9	330.7	2	0.47	292	283.8	329.6	331.8	0.971918
Q99M71	Mammalian ependymin-related protein 1 OS=Mus musculus GN=Epdr1 PE=1 SV=1	1.144	0.99883	418.3	478.4	25.94	25.68	347.5	503.6	398.1	574.8	1.44921
P63085	Mitogen-activated protein kinase 1 OS=Mus musculus GN=Mapk1 PE=1 SV=3	1.138	0.99883	194	220.7	5.84	4.89	202.2	186.1	213.2	228.5	0.920376
Q99PT1	Rho GDP-dissociation inhibitor 1 OS=Mus musculus GN=Arhgdia PE=1 SV=3	1.134	0.99883	4168	4728.4	7.36	33.26	3956.4	4390.9	6009.1	3720.6	1.10982
P70372	ELAV-like protein 1 OS=Mus musculus GN=Elavl1 PE=1 SV=2	1.126	0.99883	313.8	353.4	28.92	8.07	255	386.2	333.8	374.2	1.51451
Q5EBQ2	MCG7941, isoform CRA_f OS=Mus musculus GN=Pebp1 PE=1 SV=1	1.124	0.99883	380.7	428	3.32	61.78	389.7	371.8	683.6	267.9	0.954067
Q6P069	Sorcin OS=Mus musculus GN=Sri PE=1 SV=1	1.12	0.99883	697.2	780.8	0.77	8.99	693.4	701	832.1	732.6	1.01096
P12970	60S ribosomal protein L7a OS=Mus musculus GN=Rpl7a PE=1 SV=2	1.111	0.99883	168.1	186.7	13.5	2.23	152.7	185	189.7	183.8	1.21153
P06745	Glucose-6-phosphate isomerase OS=Mus musculus GN=Gpi PE=1 SV=4	1.111	0.99883	934.1	1037.8	7.84	23.51	883.7	987.4	1227.4	877.5	1.11735
P42225	Signal transducer and activator of transcription 1 OS=Mus musculus GN=Stat1 PE=1 SV=1	1.11	0.99883	160.5	178.3	16.42	35.89	180.4	142.9	231.1	137.5	0.792129
P29391	Ferritin light chain 1 OS=Mus musculus GN=Ftl1 PE=1 SV=2	1.108	0.99883	328.9	364.3	1.02	18.79	331.3	326.5	416.4	318.7	0.985512
P42208	Septin-2 OS=Mus musculus GN=Sept2 PE=1 SV=2	1.106	0.99883	448.6	496.2	0.06	4.07	448.8	448.4	510.7	482.1	0.999109
Q8VEK3	Heterogeneous nuclear ribonucleoprotein U OS=Mus musculus GN=Hnrnpu PE=1 SV=1	1.106	0.99883	706.6	781.6	0.56	11.33	709.4	703.8	846.9	721.3	0.992106
Q8VDM4	26S proteasome non-ATPase regulatory subunit 2 OS=Mus musculus GN=Psmd2 PE=1 SV=1	1.105	0.99883	127.7	141.1	4.52	6.43	131.8	123.7	134.8	147.6	0.938543
P17751	Triosephosphate isomerase OS=Mus musculus GN=Tpi1 PE=1 SV=4	1.102	0.99883	1206.3	1329.2	12.78	25.13	1101.8	1320.7	1590.7	1110.7	1.19867
Q3TRM8	Hexokinase-3 OS=Mus musculus GN=Hk3 PE=1 SV=2	1.102	0.99883	486.1	535.5	2.43	0.71	494.5	477.8	538.2	532.8	0.966229
Q9D1A2	Cytosolic non-specific dipeptidase OS=Mus musculus GN=Cndp2 PE=1 SV=1	1.101	0.99883	655.9	722	8.72	40.02	616.6	697.6	965.8	539.7	1.13137
Q5EBQ6	MCG10266, isoform CRA_a OS=Mus musculus GN=Rpl9 PE=1 SV=1	1.101	0.99883	40	44.1	2.36	24.83	40.7	39.4	36.9	52.6	0.968059
P03995	Glial fibrillary acidic protein OS=Mus musculus GN=Gfap PE=1 SV=4	1.1	0.99883	123.6	135.9	11.46	9.49	114	134.1	145.4	127.1	1.17632
Q922B2	Aspartate--tRNA ligase, cytoplasmic OS=Mus musculus GN=Dars PE=1 SV=2	1.1	0.99883	645.1	709.7	5.83	4.67	672.3	619	733.5	686.6	0.92072
P21619	Lamin-B2 OS=Mus musculus GN=Lmnb2 PE=1 SV=2	1.092	0.99883	272.1	297.1	0.74	8.4	273.5	270.7	280	315.3	0.989762
Q544E3	Phosphatidylinositol-4-phosphate 5-kinase, type II, alpha OS=Mus musculus GN=Pip4k2a PE=1 SV=1	1.089	0.99883	191.8	208.9	46.42	25.71	136.4	269.7	173.8	251	1.97727
Q91WU5	Arsenite methyltransferase OS=Mus musculus GN=As3mt PE=1 SV=2	1.089	0.99883	37.4	40.7	13.19	11.01	34	41	44	37.6	1.20588
Q99LR1	Monoacylglycerol lipase ABHD12 OS=Mus musculus GN=Abhd12 PE=1 SV=2	1.089	0.99883	1831.7	1994.3	2.55	18.76	1864.9	1799	2278.9	1745.2	0.964663
Q61781	Keratin, type I cytoskeletal 14 OS=Mus musculus GN=Krt14 PE=1 SV=2	1.088	0.99883	2187	2380.5	2.91	37.64	2142.4	2232.5	1812.3	3126.9	1.04206
O89017	Legumain OS=Mus musculus GN=Lgmn PE=1 SV=1	1.088	0.99883	328.5	357.5	12.45	46.56	358.9	300.8	503.3	254	0.838116
P97351	40S ribosomal protein S3a OS=Mus musculus GN=Rps3a PE=1 SV=3	1.087	0.99883	533.9	580.4	19.71	10.12	464	614.3	623.5	540.2	1.32392
Q14AQ1	Proteasome (Prosome, macropain) 26S subunit, ATPase, 6 OS=Mus musculus GN=Psmc6 PE=1 SV=1	1.087	0.99883	149	162	14.01	5.49	134.9	164.6	155.8	168.4	1.22016
P63017	Heat shock cognate 71 kDa protein OS=Mus musculus GN=Hspa8 PE=1 SV=1	1.087	0.99883	5357.2	5823.1	2.86	15.27	5249.8	5466.7	6489.7	5225	1.04132
Q5M9N8	Putative uncharacterized protein OS=Mus musculus GN=Rpl7 PE=1 SV=1	1.085	0.99883	181.6	197	2.65	37.18	185	178.2	257.8	150.5	0.963243
Q5SQB7	MCG68069 OS=Mus musculus GN=Npm1 PE=1 SV=1	1.084	0.99883	427.4	463.3	1.37	31.76	423.3	431.6	368.7	582.3	1.01961
P10605	Cathepsin B OS=Mus musculus GN=Ctsb PE=1 SV=2	1.083	0.99883	327.5	354.7	0.98	13.5	329.8	325.2	390.3	322.3	0.986052
P45376	Aldose reductase OS=Mus musculus GN=Akr1b1 PE=1 SV=3	1.079	0.99883	496.6	535.7	4.83	31.59	513.9	480	672.3	426.8	0.934034
P16858	Glyceraldehyde-3-phosphate dehydrogenase OS=Mus musculus GN=Gapdh PE=1 SV=2	1.077	0.99883	5880.3	6330.7	5.21	12.79	5667.6	6101	6931.6	5781.9	1.07647
Q99KC8	von Willebrand factor A domain-containing protein 5A OS=Mus musculus GN=Vwa5a PE=1 SV=2	1.077	0.99883	159.5	171.9	5.2	30.36	165.5	153.8	213.8	138.2	0.929305
Q8K2B3	Succinate dehydrogenase [ubiquinone] flavoprotein subunit, mitochondrial OS=Mus musculus GN=Sdha PE=1 SV=1	1.076	0.99883	409.2	440.3	3.24	12.73	399.9	418.7	481.9	402.3	1.04701
Q99NB9	Splicing factor 3B subunit 1 OS=Mus musculus GN=Sf3b1 PE=1 SV=1	1.076	0.99883	484.2	520.9	0.3	4.25	483.1	485.2	505.5	536.8	1.00435
P26039	Talin-1 OS=Mus musculus GN=Tln1 PE=1 SV=2	1.075	0.99883	1391.2	1496.3	0.48	0.08	1386.5	1396	1495.4	1497.1	1.00685
Q3UDZ1	Putative uncharacterized protein OS=Mus musculus GN=Rhog PE=1 SV=1	1.075	0.99883	414.1	445.2	10.06	39.09	444.6	385.6	591.3	335.2	0.867296
O70439	Syntaxin-7 OS=Mus musculus GN=Stx7 PE=1 SV=3	1.074	0.99883	283.7	304.8	5.23	2.12	273.4	294.4	300.3	309.4	1.07681
P50518	V-type proton ATPase subunit E 1 OS=Mus musculus GN=Atp6v1e1 PE=1 SV=2	1.073	0.99883	167.4	179.7	17.73	34.33	189.9	147.6	230.2	140.3	0.777251
P00687	Alpha-amylase 1 OS=Mus musculus GN=Amy1 PE=1 SV=2	1.071	0.99883	230.6	247.1	0.94	2.4	229.1	232.2	242.9	251.3	1.01353
P62281	40S ribosomal protein S11 OS=Mus musculus GN=Rps11 PE=1 SV=3	1.07	0.99883	414	443	0.49	19.68	412.6	415.5	509.6	385.1	1.00703
Q9CQI6	Coactosin-like protein OS=Mus musculus GN=Cotl1 PE=1 SV=3	1.069	0.99883	2555.1	2731.4	9.64	49.65	2386.5	2735.6	3941.3	1893	1.14628
Q5FWB7	Fructose-bisphosphate aldolase OS=Mus musculus GN=Aldoa PE=1 SV=1	1.069	0.99883	2453.8	2622.2	9.63	0.56	2292.1	2627	2632.5	2611.9	1.14611
P59999	Actin-related protein 2/3 complex subunit 4 OS=Mus musculus GN=Arpc4 PE=1 SV=3	1.067	0.99883	511.3	545.7	4.31	27.76	527.1	496	665.8	447.3	0.940998
Q9DBG6	Dolichyl-diphosphooligosaccharide--protein glycosyltransferase subunit 2 OS=Mus musculus GN=Rpn2 PE=1 SV=1	1.067	0.99883	194.1	207.1	10.03	38.75	208.4	180.8	274.4	156.4	0.867562
Q9D1E6	Tubulin-folding cofactor B OS=Mus musculus GN=Tbcb PE=1 SV=2	1.066	0.99883	302	322	11.26	8.6	278.9	327.1	303	342.2	1.17282
B2RXW1	Histidine ammonia-lyase OS=Mus musculus GN=Hal PE=1 SV=1	1.066	0.99883	171.2	182.5	31.09	37.98	214.1	136.9	138.6	240.4	0.639421
P50429	Arylsulfatase B OS=Mus musculus GN=Arsb PE=1 SV=3	1.062	0.99883	591.5	628.2	2.27	6.75	582	601	598.9	658.9	1.03265
Q3ULT2	Actinin alpha 4 OS=Mus musculus GN=Actn4 PE=1 SV=1	1.062	0.99883	231.1	245.5	1.91	23.49	234.2	228	207.6	290.3	0.973527
Q9CXW4	60S ribosomal protein L11 OS=Mus musculus GN=Rpl11 PE=1 SV=4	1.058	0.99883	534	565	10.91	19.96	494.3	576.9	651.3	490.2	1.1671
P45878	Peptidyl-prolyl cis-trans isomerase FKBP2 OS=Mus musculus GN=Fkbp2 PE=1 SV=1	1.057	0.99883	219	231.5	2.67	49.92	214.9	223.1	334.8	160.1	1.03816
P11499	Heat shock protein HSP 90-beta OS=Mus musculus GN=Hsp90ab1 PE=1 SV=3	1.056	0.99883	181.4	191.7	5.59	20.36	174.4	188.8	165.8	221.6	1.08257
Q8BHN3	Neutral alpha-glucosidase AB OS=Mus musculus GN=Ganab PE=1 SV=1	1.054	0.99883	440.7	464.3	2.68	18.19	449.1	432.4	528.4	408	0.962815
P09103	Protein disulfide-isomerase OS=Mus musculus GN=P4hb PE=1 SV=2	1.051	0.99883	259.5	272.6	1.33	1.66	261.9	257.1	275.8	269.4	0.981672
Q01405	Protein transport protein Sec23A OS=Mus musculus GN=Sec23a PE=1 SV=2	1.051	0.99883	88.7	93.1	3.39	9.32	90.8	86.6	99.5	87.2	0.953744
Q91YQ5	Dolichyl-diphosphooligosaccharide--protein glycosyltransferase subunit 1 OS=Mus musculus GN=Rpn1 PE=1 SV=1	1.05	0.99883	149.1	156.5	8.59	2.97	140.3	158.4	153.2	159.8	1.12901
P07744	Keratin, type II cytoskeletal 4 OS=Mus musculus GN=Krt4 PE=1 SV=2	1.05	0.99883	2801.9	2942.3	0.71	18.61	2787.8	2816.1	2577.6	3358.6	1.01015
Q8R317	Ubiquilin-1 OS=Mus musculus GN=Ubqln1 PE=1 SV=1	1.05	0.99883	157.9	165.8	7.04	5.21	166	150.2	172	159.8	0.904819
P60710	Actin, cytoplasmic 1 OS=Mus musculus GN=Actb PE=1 SV=1	1.049	0.99883	9864.2	10346.1	0.5	23.28	9829.7	9898.9	12215.7	8762.6	1.00704
P20029	78 kDa glucose-regulated protein OS=Mus musculus GN=Hspa5 PE=1 SV=3	1.049	0.99883	1768	1854.4	5.21	17.51	1834.3	1704	1637.4	2100.1	0.928965
Q99KK7	Dipeptidyl peptidase 3 OS=Mus musculus GN=Dpp3 PE=1 SV=2	1.048	0.99883	428.5	449	2.86	3.66	437.3	420	460.8	437.6	0.960439
Q3TIX6	Far upstream element (FUSE)-binding protein 3 OS=Mus musculus GN=Fubp3 PE=1 SV=1	1.047	0.99883	185.7	194.3	20.48	15.26	160.5	214.8	174.4	216.6	1.33832
Q99KI0	Aconitate hydratase, mitochondrial OS=Mus musculus GN=Aco2 PE=1 SV=1	1.046	0.99883	1928.9	2017.3	10.23	2.02	1794.2	2073.8	2046.4	1988.7	1.15584
Q61171	Peroxiredoxin-2 OS=Mus musculus GN=Prdx2 PE=1 SV=3	1.046	0.99883	1072.4	1121.7	4.57	14.11	1038.3	1107.6	1014.9	1239.8	1.06674
P12382	ATP-dependent 6-phosphofructokinase, liver type OS=Mus musculus GN=Pfkl PE=1 SV=4	1.046	0.99883	82.4	86.1	13.77	23.56	90.8	74.7	101.9	72.8	0.822687
Q60692	Proteasome subunit beta type-6 OS=Mus musculus GN=Psmb6 PE=1 SV=3	1.045	0.99883	253.5	265	13.01	23.2	231.2	278	224.6	312.7	1.20242
Q61553	Fascin OS=Mus musculus GN=Fscn1 PE=1 SV=4	1.045	0.99883	990.5	1034.9	6.57	17.28	945.5	1037.7	1170.1	915.3	1.09751
P35700	Peroxiredoxin-1 OS=Mus musculus GN=Prdx1 PE=1 SV=1	1.045	0.99883	948.2	991.2	0.92	21.85	954.4	942	1158.3	848.3	0.987008
P47738	Aldehyde dehydrogenase, mitochondrial OS=Mus musculus GN=Aldh2 PE=1 SV=1	1.044	0.99883	114.7	119.7	2.17	16.63	112.9	116.4	134.7	106.4	1.031
Q7TMB8	Cytoplasmic FMR1-interacting protein 1 OS=Mus musculus GN=Cyfip1 PE=1 SV=1	1.043	0.99883	541.7	565.1	2.62	1.24	551.8	531.8	570.1	560.2	0.963755
Q58EW0	MCG132477, isoform CRA_a OS=Mus musculus GN=Rpl18 PE=1 SV=1	1.042	0.99883	444.3	462.9	9.13	3.35	416.5	474	474	452.1	1.13806
Q8BPU7	Engulfment and cell motility protein 1 OS=Mus musculus GN=Elmo1 PE=1 SV=2	1.042	0.99883	243.3	253.5	4	5.87	250.3	236.5	264.3	243.2	0.944866
P50446	Keratin, type II cytoskeletal 6A OS=Mus musculus GN=Krt6a PE=1 SV=3	1.039	0.99883	4141.9	4301.9	14.13	36.65	4578.7	3746.7	3299.8	5608.4	0.818289
P67778	Prohibitin OS=Mus musculus GN=Phb PE=1 SV=1	1.038	0.99883	216.7	224.8	3.94	0.62	210.7	222.8	225.8	223.8	1.05743
Q61656	Probable ATP-dependent RNA helicase DDX5 OS=Mus musculus GN=Ddx5 PE=1 SV=2	1.038	0.99883	649.7	674.1	2.31	12.46	660.4	639.2	617.1	736.4	0.967898
P07356	Annexin A2 OS=Mus musculus GN=Anxa2 PE=1 SV=2	1.036	0.99883	4611.4	4779.2	4.72	19.85	4767.8	4460.1	4149.4	5504.6	0.935463
Q3TQ70	Beta1 subnuit of GTP-binding protein OS=Mus musculus GN=Gnb1 PE=1 SV=1	1.035	0.99883	1062.5	1099.1	10.91	15.41	983.5	1147.8	1226.2	985.3	1.16706
Q9D0K2	Succinyl-CoA:3-ketoacid coenzyme A transferase 1, mitochondrial OS=Mus musculus GN=Oxct1 PE=1 SV=1	1.034	0.99883	186.5	192.8	22.38	2.91	159	218.8	188.9	196.8	1.3761
P19973	Lymphocyte-specific protein 1 OS=Mus musculus GN=Lsp1 PE=1 SV=2	1.034	0.99883	297.3	307.5	20.57	3.11	256.8	344.2	300.8	314.3	1.34034
Q01853	Transitional endoplasmic reticulum ATPase OS=Mus musculus GN=Vcp PE=1 SV=4	1.033	0.99883	2267.9	2343.1	3.61	11.22	2326.5	2210.7	2537	2164	0.950226
Q9R269	Periplakin OS=Mus musculus GN=Ppl PE=1 SV=1	1.033	0.99883	241.3	249.3	24.92	28.91	288.3	201.9	202.6	306.7	0.700312
Q9R1P3	Proteasome subunit beta type-2 OS=Mus musculus GN=Psmb2 PE=1 SV=1	1.031	0.99883	306.1	315.7	5.38	9.23	317.9	294.6	295.7	337	0.926707
Q8R016	Bleomycin hydrolase OS=Mus musculus GN=Blmh PE=1 SV=1	1.026	0.99883	2428.1	2490.1	13.4	31.92	2670.3	2207.9	1979.1	3133	0.826836
P49710	Hematopoietic lineage cell-specific protein OS=Mus musculus GN=Hcls1 PE=1 SV=2	1.025	0.99883	267.4	273.9	18.34	31.93	234.7	304.6	344.7	217.7	1.29783
Q8VDM6	Heterogeneous nuclear ribonucleoprotein U-like protein 1 OS=Mus musculus GN=Hnrnpul1 PE=1 SV=1	1.025	0.99883	823.7	844.5	9.64	4.24	769.3	881.9	870.2	819.6	1.14637
Q91V61	Sideroflexin-3 OS=Mus musculus GN=Sfxn3 PE=1 SV=1	1.024	0.99883	223.8	229.1	0.72	3.03	222.6	224.9	234.1	224.3	1.01033
P61161	Actin-related protein 2 OS=Mus musculus GN=Actr2 PE=1 SV=1	1.024	0.99883	971.1	994.9	5.75	20.66	1011.5	932.4	1152.6	858.7	0.921799
P62301	40S ribosomal protein S13 OS=Mus musculus GN=Rps13 PE=1 SV=2	1.022	0.99883	285.6	291.9	22.92	3.62	242.6	336.4	284.5	299.5	1.38664
Q545X8	40S ribosomal protein S4 OS=Mus musculus GN=Rps4x PE=1 SV=1	1.022	0.99883	485.7	496.5	7.5	20.93	460.6	512.2	576.3	427.7	1.11203
Q8VHN8	Tudor-interacting repair regulator protein OS=Mus musculus GN=Nudt16l1 PE=1 SV=2	1.022	0.99883	57.9	59.2	4.74	24.39	59.8	56	49.7	70.4	0.936455
P63101	14-3-3 protein zeta/delta OS=Mus musculus GN=Ywhaz PE=1 SV=1	1.021	0.99883	1976.3	2017.1	2.83	7.84	2016.3	1937.1	2132.2	1908.2	0.96072
P19783	Cytochrome c oxidase subunit 4 isoform 1, mitochondrial OS=Mus musculus GN=Cox4i1 PE=1 SV=2	1.019	0.99883	1130.1	1151.3	9.84	31.79	1211.7	1054.1	1447.1	916	0.869935
Q68FD5	Clathrin heavy chain 1 OS=Mus musculus GN=Cltc PE=1 SV=3	1.019	0.99883	2046	2085.9	15.23	20.27	2279.5	1836.4	2409.7	1805.5	0.805615
Q9JM76	Actin-related protein 2/3 complex subunit 3 OS=Mus musculus GN=Arpc3 PE=1 SV=3	1.018	0.99883	486.9	495.7	4.38	34.75	472.1	502.2	637.1	385.8	1.06376
P05202	Aspartate aminotransferase, mitochondrial OS=Mus musculus GN=Got2 PE=1 SV=1	1.016	0.99883	852.6	866	9.36	4.82	797.9	910.9	837	896	1.14162
Q00PI9	Heterogeneous nuclear ribonucleoprotein U-like protein 2 OS=Mus musculus GN=Hnrnpul2 PE=1 SV=2	1.016	0.99883	343.2	348.6	6.78	11.47	327.1	360.1	378.1	321.4	1.10089
Q5FW97	Enolase 1, alpha non-neuron OS=Mus musculus GN=EG433182 PE=1 SV=1	1.015	0.99883	4689.9	4761.1	4.18	0.03	4553.2	4830.6	4760	4762.1	1.06092
Q58EV4	Proteasome subunit alpha type OS=Mus musculus GN=Psma3 PE=1 SV=1	1.015	0.99883	1199.5	1217.7	5.65	11.33	1248.4	1152.5	1123.8	1319.5	0.923182
Q9WTM5	RuvB-like 2 OS=Mus musculus GN=Ruvbl2 PE=1 SV=3	1.014	0.99883	109.5	111	14.96	18.41	98.5	121.8	97.4	126.5	1.23655
A8IP69	14-3-3 protein gamma subtype OS=Mus musculus GN=Ywhag PE=1 SV=1	1.013	0.99883	923.2	935.1	43.53	8.63	671.6	1268.9	994.1	879.7	1.88937
P99029	Peroxiredoxin-5, mitochondrial OS=Mus musculus GN=Prdx5 PE=1 SV=2	1.011	0.99883	340.8	344.4	33.97	29.17	266.7	435.4	424.6	279.4	1.63255
O08583	THO complex subunit 4 OS=Mus musculus GN=Alyref PE=1 SV=3	1.011	0.99883	308	311.3	22.02	0.73	263.2	360.3	312.9	309.7	1.36892
Q922R8	Protein disulfide-isomerase A6 OS=Mus musculus GN=Pdia6 PE=1 SV=3	1.011	0.99883	281.4	284.6	2.98	5.72	287.4	275.5	296.3	273.3	0.958594
Q6ZWV3	60S ribosomal protein L10 OS=Mus musculus GN=Rpl10 PE=1 SV=3	1.011	0.99883	968.2	979.1	3.91	27.84	995.4	941.8	1195.2	802	0.946152
P05555	Integrin alpha-M OS=Mus musculus GN=Itgam PE=1 SV=2	1.011	0.99883	191.4	193.6	8.59	2.04	203.4	180.1	190.8	196.4	0.885447
Q9CQ69	Cytochrome b-c1 complex subunit 8 OS=Mus musculus GN=Uqcrq PE=1 SV=3	1.01	0.99883	113.2	114.4	23.35	19.81	95.8	133.7	131.7	99.3	1.39562
Q8VEM8	Phosphate carrier protein, mitochondrial OS=Mus musculus GN=Slc25a3 PE=1 SV=1	1.01	0.99883	711.8	719.1	17.04	10.49	803.5	630.7	774.6	667.7	0.784941
P14206	40S ribosomal protein SA OS=Mus musculus GN=Rpsa PE=1 SV=4	1.008	0.99883	525.5	529.7	13	19.78	479.2	576.2	609.8	460.1	1.20242
P62264	40S ribosomal protein S14 OS=Mus musculus GN=Rps14 PE=1 SV=3	1.007	0.99883	452.3	455.3	32.09	6.93	359.1	569.8	478.2	433.5	1.58674
Q8C2Q3	RNA-binding protein 14 OS=Mus musculus GN=Rbm14 PE=1 SV=1	1.006	0.99883	615.1	618.5	11.3	4.05	567.7	666.3	601	636.5	1.17368
Q9EPB4	Apoptosis-associated speck-like protein containing a CARD OS=Mus musculus GN=Pycard PE=1 SV=1	1.006	0.99883	628.3	632	0.43	13.27	630.2	626.4	694.4	575.2	0.99397
Q8VIJ6	Splicing factor, proline- and glutamine-rich OS=Mus musculus GN=Sfpq PE=1 SV=1	1.004	0.99883	1458	1464.4	15.82	4.53	1303.1	1631.4	1418.3	1512.1	1.25194
Q8VDD5	Myosin-9 OS=Mus musculus GN=Myh9 PE=1 SV=4	1.004	0.99883	1326.4	1331.9	11.45	33.38	1438.6	1223	1047.1	1694.2	0.850132
P60843	Eukaryotic initiation factor 4A-I OS=Mus musculus GN=Eif4a1 PE=1 SV=1	1.004	0.99883	524.2	526.5	15.9	8.51	586.9	468.2	559.2	495.7	0.797751
P57776	Elongation factor 1-delta OS=Mus musculus GN=Eef1d PE=1 SV=3	1.002	0.99883	452.9	453.9	9.71	3.07	422.9	485.2	444.2	463.9	1.14732
P62918	60S ribosomal protein L8 OS=Mus musculus GN=Rpl8 PE=1 SV=2	1.001	0.99883	280.4	280.7	2.61	0.71	285.7	275.3	282.1	279.3	0.963598
Q499X4	Putative uncharacterized protein OS=Mus musculus GN=Vat1 PE=1 SV=1	1.001	0.99883	58.4	58.4	17.71	4.76	66.2	51.5	60.4	56.5	0.777946
Q3U4U6	T-complex protein 1 subunit gamma OS=Mus musculus GN=Cct3 PE=1 SV=1	1	0.99883	175.2	175.1	6.61	24.35	183.6	167.2	208.4	147.2	0.910675
Q61233	Plastin-2 OS=Mus musculus GN=Lcp1 PE=1 SV=4	1	0.99883	513.9	514	31.65	27.77	645.3	409.3	627.1	421.3	0.634279
P11983	T-complex protein 1 subunit alpha OS=Mus musculus GN=Tcp1 PE=1 SV=3	0.999	0.99883	203.1	203	1.09	17.68	204.7	201.6	230.2	179	0.984856
Q5SS40	Putative uncharacterized protein OS=Mus musculus GN=Ywhae PE=1 SV=1	0.998	0.99883	1024.3	1022.1	4.26	29.26	1055.7	993.9	1260.9	828.6	0.941461
Q99PV0	Pre-mRNA-processing-splicing factor 8 OS=Mus musculus GN=Prpf8 PE=1 SV=2	0.995	0.99883	174.5	173.7	1.97	7.93	176.9	172	183.7	164.2	0.972301
O88569	Heterogeneous nuclear ribonucleoproteins A2/B1 OS=Mus musculus GN=Hnrnpa2b1 PE=1 SV=2	0.993	0.99883	5183.2	5144.4	33.34	1.4	4076.1	6591	5195.4	5093.9	1.61699
Q53ZU7	Peroxiredoxin 6 OS=Mus musculus GN=Prdx6 PE=2 SV=1	0.993	0.99883	196.8	195.4	1.31	30.13	195	198.6	242.6	157.4	1.01846
Q0VBK2	Keratin, type II cytoskeletal 80 OS=Mus musculus GN=Krt80 PE=1 SV=1	0.993	0.99883	604.2	599.6	5.47	17.39	628	581.2	529.9	678.5	0.925478
Q78ZJ8	MCG22989, isoform CRA_b OS=Mus musculus GN=Rab11b PE=1 SV=1	0.993	0.99883	442.8	439.6	7.29	9.19	466.3	420.6	469.2	412	0.901994
P62835	Ras-related protein Rap-1A OS=Mus musculus GN=Rap1a PE=1 SV=1	0.992	0.99883	466.5	462.6	5.85	45.05	486.2	447.6	643.5	332.6	0.920609
Q9R1P1	Proteasome subunit beta type-3 OS=Mus musculus GN=Psmb3 PE=1 SV=1	0.991	0.99883	538.2	533.4	13.99	29.06	594.3	487.3	657	433	0.819956
P62962	Profilin-1 OS=Mus musculus GN=Pfn1 PE=1 SV=2	0.99	0.99883	1089.3	1078.9	7.86	39.95	1151.6	1030.3	1442.4	807	0.894668
P39054	Dynamin-2 OS=Mus musculus GN=Dnm2 PE=1 SV=2	0.99	0.99883	315	311.7	10.45	10.65	339.2	292.5	336.1	289	0.862323
Q4FJL0	Putative uncharacterized protein OS=Mus musculus GN=Rab10 PE=1 SV=1	0.989	0.99883	367	362.9	2.42	17.42	360.8	373.4	320.6	410.7	1.03492
Q3U1N0	Coronin OS=Mus musculus GN=Coro1a PE=1 SV=1	0.988	0.99883	3901.9	3853.5	6.94	29.5	3714.9	4098.4	4762.2	3118.2	1.10323
B2RXY7	Carbonyl reductase 1 OS=Mus musculus GN=Cbr1 PE=1 SV=1	0.986	0.99883	534.1	526.7	6.9	8.74	508.6	560.8	560.3	495.1	1.10263
P62717	60S ribosomal protein L18a OS=Mus musculus GN=Rpl18a PE=1 SV=1	0.986	0.99883	552	544.4	4.74	34.78	533.8	570.8	699.8	423.5	1.06931
Q7TSI3	Serine/threonine-protein phosphatase 6 regulatory subunit 1 OS=Mus musculus GN=Ppp6r1 PE=1 SV=1	0.986	0.99883	176.7	174.3	0.88	5.95	177.8	175.6	167.1	181.8	0.987627
Q06185	ATP synthase subunit e, mitochondrial OS=Mus musculus GN=Atp5i PE=1 SV=2	0.985	0.99883	308.9	304.3	2.58	41.93	303.3	314.6	413.1	224.2	1.03726
P27773	Protein disulfide-isomerase A3 OS=Mus musculus GN=Pdia3 PE=1 SV=2	0.984	0.99883	1330.3	1309.3	4.02	25.88	1293	1368.6	1575.5	1088	1.05847
O70456	14-3-3 protein sigma OS=Mus musculus GN=Sfn PE=1 SV=2	0.984	0.99883	933	917.7	3.29	28.28	955	911.5	749.3	1123.9	0.95445
A2A5V4	SH3 domain-binding protein 1 OS=Mus musculus GN=Sh3bp1 PE=1 SV=1	0.983	0.99883	153.5	150.9	5.42	14.32	159.5	147.7	167	136.3	0.926019
P60335	Poly(rC)-binding protein 1 OS=Mus musculus GN=Pcbp1 PE=1 SV=1	0.982	0.99883	1538	1510.6	4.86	2.14	1486	1591.8	1533.6	1487.9	1.0712
Q8BMS1	Trifunctional enzyme subunit alpha, mitochondrial OS=Mus musculus GN=Hadha PE=1 SV=1	0.982	0.99883	288.8	283.6	12	34.5	314.4	265.2	363.8	221.1	0.843511
B2RTM0	Histone H4 OS=Mus musculus GN=Hist2h4 PE=1 SV=1	0.98	0.99883	23902	23427.8	36.43	37.41	18365.1	31108.2	30719.8	17866.7	1.69388
Q5YLW3	Putative uncharacterized protein OS=Mus musculus GN=Rps3 PE=1 SV=1	0.98	0.99883	1363.6	1336	2.08	17.75	1343.6	1383.8	1515.7	1177.7	1.02992
Q8C845	EF-hand domain-containing protein D2 OS=Mus musculus GN=Efhd2 PE=1 SV=1	0.98	0.99883	1482.6	1452.6	6.05	25.36	1547.5	1420.5	1741.3	1211.8	0.917932
Q8CIH5	1-phosphatidylinositol 4,5-bisphosphate phosphodiesterase gamma-2 OS=Mus musculus GN=Plcg2 PE=1 SV=1	0.979	0.99883	120.7	118.2	7.55	18.12	114.4	127.3	134.4	103.9	1.11276
G3X9C2	F-box only protein 50 OS=Mus musculus GN=Nccrp1 PE=1 SV=2	0.977	0.99883	2067.2	2019.5	5.64	23.84	1986.4	2151.4	1703.5	2394.2	1.08306
Q9CY58	Plasminogen activator inhibitor 1 RNA-binding protein OS=Mus musculus GN=Serbp1 PE=1 SV=2	0.974	0.99883	282.7	275.4	8.15	39.28	266.8	299.5	366.3	207.1	1.12256
Q6ZWN5	40S ribosomal protein S9 OS=Mus musculus GN=Rps9 PE=1 SV=3	0.974	0.99883	938.4	913.8	5.11	35.67	973	905.1	1182.5	706.1	0.930216
Q5DQJ3	Capping protein (Actin filament) muscle Z-line, alpha 2, isoform CRA_c OS=Mus musculus GN=Capza2 PE=1 SV=1	0.973	0.99883	225.9	219.8	20.47	15.72	261.4	195.3	245.8	196.6	0.747131
P62814	V-type proton ATPase subunit B, brain isoform OS=Mus musculus GN=Atp6v1b2 PE=1 SV=1	0.972	0.99883	76.1	74	24.93	38.88	90.9	63.7	98.1	55.8	0.70077
P28063	Proteasome subunit beta type-8 OS=Mus musculus GN=Psmb8 PE=1 SV=2	0.971	0.99883	379.9	368.9	13.59	7.15	345	418.3	350.7	388	1.21246
Q3UAD6	Heat shock protein 90kDa beta (Grp94), member 1 OS=Mus musculus GN=Hsp90b1 PE=1 SV=1	0.969	0.99883	74.9	72.6	3.34	4.32	76.7	73.2	70.4	74.8	0.954368
P80315	T-complex protein 1 subunit delta OS=Mus musculus GN=Cct4 PE=1 SV=3	0.968	0.99883	301	291.4	0.55	4.53	302.2	299.9	300.9	282.2	0.992389
P62830	60S ribosomal protein L23 OS=Mus musculus GN=Rpl23 PE=1 SV=1	0.967	0.99883	115.4	111.6	13.53	31.07	104.8	127	139.5	89.2	1.21183
Q9CZU6	Citrate synthase, mitochondrial OS=Mus musculus GN=Cs PE=1 SV=1	0.966	0.99883	857.4	828.3	1.25	10.7	849.9	865.1	893.5	767.8	1.01788
Q91VM5	RNA binding motif protein, X-linked-like-1 OS=Mus musculus GN=Rbmxl1 PE=1 SV=1	0.965	0.99883	1079	1040.7	22.43	14.33	919.5	1266.2	940.1	1152.1	1.37705
Q5SUR0	Phosphoribosylformylglycinamidine synthase OS=Mus musculus GN=Pfas PE=1 SV=1	0.965	0.99883	148.4	143.2	0.72	0.37	149.1	147.6	142.8	143.6	0.98994
Q564D0	Fusion, derived from t(12;16) malignant liposarcoma (Human), isoform CRA_a OS=Mus musculus GN=Fus PE=1 SV=1	0.965	0.99883	181.7	175.3	26.47	45.66	219.6	150.3	245	125.4	0.684426
Q6WVG3	BTB/POZ domain-containing protein KCTD12 OS=Mus musculus GN=Kctd12 PE=1 SV=1	0.964	0.99883	1503.1	1449.4	9.91	7.78	1401.3	1612.4	1531.5	1371.7	1.15065
P68372	Tubulin beta-4B chain OS=Mus musculus GN=Tubb4b PE=1 SV=1	0.964	0.99883	132.7	127.9	6.41	45.49	126.8	138.8	178.5	91.6	1.09464
Q03265	ATP synthase subunit alpha, mitochondrial OS=Mus musculus GN=Atp5a1 PE=1 SV=1	0.963	0.99883	3946	3799.8	7.34	14.23	3746.2	4156.5	4203.4	3434.9	1.10952
P18760	Cofilin-1 OS=Mus musculus GN=Cfl1 PE=1 SV=3	0.959	0.99883	997.1	956.5	2.15	26.48	1012.3	982.1	1156	791.4	0.970167
Q9ERN0	Secretory carrier-associated membrane protein 2 OS=Mus musculus GN=Scamp2 PE=1 SV=1	0.958	0.99883	167.7	160.7	10.42	6.45	155.8	180.6	168.2	153.5	1.15918
P08752	Guanine nucleotide-binding protein G(i) subunit alpha-2 OS=Mus musculus GN=Gnai2 PE=1 SV=5	0.958	0.99883	349.9	335.2	3.45	23.17	358.5	341.5	395.5	284.2	0.95258
Q9D0E1	Heterogeneous nuclear ribonucleoprotein M OS=Mus musculus GN=Hnrnpm PE=1 SV=3	0.957	0.99883	1162.2	1112.6	17.04	1.84	1029.6	1311.8	1127.2	1098.2	1.27409
Q3TTY5	Keratin, type II cytoskeletal 2 epidermal OS=Mus musculus GN=Krt2 PE=1 SV=1	0.954	0.99883	49488.2	47209.9	16.22	8.41	55532.4	44101.8	44480.8	50106.4	0.794163
Q9JLF6	Protein-glutamine gamma-glutamyltransferase K OS=Mus musculus GN=Tgm1 PE=1 SV=2	0.952	0.99883	2298.7	2188.1	12.72	17.17	2515.7	2100.4	1936.8	2471.9	0.834917
Q8VEB4	Group XV phospholipase A2 OS=Mus musculus GN=Pla2g15 PE=1 SV=1	0.951	0.99883	268.4	255.3	10.73	6.73	289.6	248.8	267.8	243.5	0.859116
Q04207	Transcription factor p65 OS=Mus musculus GN=Rela PE=1 SV=1	0.95	0.99883	69.9	66.4	3.61	6.62	68.2	71.7	63.4	69.6	1.05132
Q3TQX5	Putative uncharacterized protein OS=Mus musculus GN=Ddx3x PE=1 SV=1	0.95	0.99883	282.6	268.4	4.19	5.88	291.1	274.4	257.5	279.9	0.942631
P70261	Paladin OS=Mus musculus GN=Pald1 PE=1 SV=1	0.95	0.99883	140.8	133.7	15.57	1.79	157.2	126	132	135.4	0.801527
Q99P72	Reticulon-4 OS=Mus musculus GN=Rtn4 PE=1 SV=2	0.947	0.99883	574.8	544.4	8.59	6.91	610.8	540.9	571.7	518.4	0.88556
P11835	Integrin beta-2 OS=Mus musculus GN=Itgb2 PE=1 SV=2	0.946	0.99883	327.5	309.7	26.56	9.29	270.8	396	330.7	289.9	1.46233
P63276	40S ribosomal protein S17 OS=Mus musculus GN=Rps17 PE=1 SV=2	0.946	0.99883	291	275.4	4.36	39.42	282.2	300.1	366.7	206.8	1.06343
P47962	60S ribosomal protein L5 OS=Mus musculus GN=Rpl5 PE=1 SV=3	0.946	0.99883	336.6	318.3	3.7	31.93	327.9	345.5	400.5	253	1.05367
Q4FK11	Nono protein OS=Mus musculus GN=Nono PE=2 SV=1	0.946	0.99883	488.1	461.9	2.41	13.27	496.5	479.8	507.5	420.5	0.966365
P21107	Tropomyosin alpha-3 chain OS=Mus musculus GN=Tpm3 PE=1 SV=3	0.945	0.99883	586.4	553.9	9.17	13.53	625.8	549.6	503.2	609.7	0.878236
Q62318	Transcription intermediary factor 1-beta OS=Mus musculus GN=Trim28 PE=1 SV=3	0.944	0.99883	770.9	727.9	16.7	8.89	684.7	868	775.2	683.5	1.26771
Q540D7	Aldehyde reductase OS=Mus musculus GN=Akr1a1 PE=1 SV=1	0.944	0.99883	599.1	565.6	2.06	17.58	590.5	607.9	640.9	499.2	1.02947
Q497E9	40S ribosomal protein S8 OS=Mus musculus GN=Rps8 PE=1 SV=1	0.943	0.99883	105.1	99.1	0.78	17.31	104.5	105.6	112.1	87.7	1.01053
P97371	Proteasome activator complex subunit 1 OS=Mus musculus GN=Psme1 PE=1 SV=2	0.943	0.99883	696.3	656.3	8.39	38.26	738.9	656.1	866.2	497.3	0.887942
P20065	Thymosin beta-4 OS=Mus musculus GN=Tmsb4x PE=1 SV=1	0.942	0.99883	531.9	501.3	39.97	19.25	397.8	711.3	574.9	437.1	1.78808
P20152	Vimentin OS=Mus musculus GN=Vim PE=1 SV=3	0.942	0.99883	1591.7	1499.7	1.68	11.67	1572.8	1610.7	1629	1380.7	1.0241
O08528	Hexokinase-2 OS=Mus musculus GN=Hk2 PE=1 SV=1	0.942	0.99883	552.2	520	4.56	8.29	570.3	534.7	551.4	490.3	0.937577
O08547	Vesicle-trafficking protein SEC22b OS=Mus musculus GN=Sec22b PE=1 SV=3	0.942	0.99883	266.9	251.5	16.77	1.67	300.7	236.9	254.5	248.6	0.787828
O08692	Neutrophilic granule protein OS=Mus musculus GN=Ngp PE=1 SV=1	0.941	0.99883	1064.1	1000.8	3.23	14.63	1040	1088.7	902.1	1110.3	1.04683
Q9R1P4	Proteasome subunit alpha type-1 OS=Mus musculus GN=Psma1 PE=1 SV=1	0.941	0.99883	484.6	456	9.51	18.43	518.4	453	400	519.9	0.873843
Q91W06	V-type proton ATPase subunit a OS=Mus musculus GN=Tcirg1 PE=2 SV=1	0.939	0.99883	298.9	280.6	1.86	16.27	295	302.8	250	315	1.02644
P04104	Keratin, type II cytoskeletal 1 OS=Mus musculus GN=Krt1 PE=1 SV=4	0.939	0.99883	19222.8	18043.2	9.79	31.75	20602.5	17935.6	14358.7	22673.3	0.870555
Q9CZX8	40S ribosomal protein S19 OS=Mus musculus GN=Rps19 PE=1 SV=3	0.938	0.99883	636.2	596.5	13.69	18.39	577.3	701.1	679.9	523.4	1.21445
Q8R574	Phosphoribosyl pyrophosphate synthase-associated protein 2 OS=Mus musculus GN=Prpsap2 PE=1 SV=1	0.938	0.99883	94.9	89	12.57	13.42	103.7	86.8	80.9	97.9	0.83703
Q9CZ44	NSFL1 cofactor p47 OS=Mus musculus GN=Nsfl1c PE=1 SV=1	0.936	0.99883	561.6	525.8	1.93	4.62	554	569.4	543.3	508.9	1.0278
Q99LX0	Protein DJ-1 OS=Mus musculus GN=Park7 PE=1 SV=1	0.936	0.99883	783.2	733.4	14.85	27	870.3	704.9	889.8	604.5	0.809951
Q91YI0	Argininosuccinate lyase OS=Mus musculus GN=Asl PE=1 SV=1	0.935	0.99883	253.7	237.2	10.61	0.22	273.5	235.4	237.6	236.9	0.860695
P54071	Isocitrate dehydrogenase [NADP], mitochondrial OS=Mus musculus GN=Idh2 PE=1 SV=3	0.934	0.99883	148.3	138.5	6.19	0.85	154.9	141.9	137.7	139.4	0.916075
A2RS22	Coronin OS=Mus musculus GN=Coro1b PE=1 SV=1	0.932	0.99883	728.5	678.7	12.79	41.37	665.3	797.6	917.3	502.1	1.19886
Q9CPY7	Cytosol aminopeptidase OS=Mus musculus GN=Lap3 PE=1 SV=3	0.931	0.99883	189.5	176.5	6.57	2.02	198.6	180.9	174	179	0.910876
Q3U6G1	Biliverdin reductase B (Flavin reductase (NADPH)) OS=Mus musculus GN=Blvrb PE=1 SV=1	0.93	0.99883	888.7	826.6	4.02	4	863.8	914.3	803.5	850.3	1.05846
Q64521	Glycerol-3-phosphate dehydrogenase, mitochondrial OS=Mus musculus GN=Gpd2 PE=1 SV=2	0.928	0.99883	83	77	16.27	0.49	74	93.2	77.3	76.8	1.25946
Q61598	Rab GDP dissociation inhibitor beta OS=Mus musculus GN=Gdi2 PE=1 SV=1	0.928	0.99883	1200.4	1114.6	1.75	29.77	1215.4	1185.7	1380.1	900.1	0.975564
Q8BJS4	SUN domain-containing protein 2 OS=Mus musculus GN=Sun2 PE=1 SV=3	0.927	0.99883	215.6	199.8	0.33	9.62	216.1	215.1	213.9	186.6	0.995373
O55234	Proteasome subunit beta type-5 OS=Mus musculus GN=Psmb5 PE=1 SV=3	0.927	0.99883	457.8	424.3	7.9	4.47	484.1	432.9	411.1	437.9	0.894237
Q4VAG4	MCG12304 OS=Mus musculus GN=Rpl22 PE=1 SV=1	0.927	0.99883	650.4	603.2	9.8	27.3	697.1	606.8	733.4	496.1	0.870463
Q9CPQ1	Cytochrome c oxidase subunit 6C OS=Mus musculus GN=Cox6c PE=1 SV=3	0.926	0.99883	430.5	398.7	2.35	48	437.7	423.4	567.7	280	0.967329
P38647	Stress-70 protein, mitochondrial OS=Mus musculus GN=Hspa9 PE=1 SV=3	0.925	0.99883	258.4	239.1	10.49	20.88	239.9	278.4	277.4	206	1.16048
Q7TSF1	Desmoglein-1-beta OS=Mus musculus GN=Dsg1b PE=1 SV=1	0.924	0.99883	2918	2695	8.17	11.9	3091.6	2754.1	2477.1	2932.1	0.890833
P26443	Glutamate dehydrogenase 1, mitochondrial OS=Mus musculus GN=Glud1 PE=1 SV=1	0.923	0.99883	499.9	461.2	14.76	7.75	450.2	555.1	487.2	436.6	1.23301
O70370	Cathepsin S OS=Mus musculus GN=Ctss PE=1 SV=2	0.922	0.99883	227.8	210	39.84	37.63	170.6	304.4	275.8	159.9	1.78429
P58252	Elongation factor 2 OS=Mus musculus GN=Eef2 PE=1 SV=2	0.92	0.99883	705.2	648.8	5.21	12.92	731.7	679.7	711.1	592	0.928933
P70441	Na(+)/H(+) exchange regulatory cofactor NHE-RF1 OS=Mus musculus GN=Slc9a3r1 PE=1 SV=3	0.919	0.99883	136.9	125.9	1.74	1.89	135.2	138.6	124.2	127.6	1.02515
Q9DC69	NADH dehydrogenase [ubiquinone] 1 alpha subcomplex subunit 9, mitochondrial OS=Mus musculus GN=Ndufa9 PE=1 SV=2	0.919	0.99883	96.5	88.7	6.81	38.19	101.3	92	117	67.2	0.908193
P05213	Tubulin alpha-1B chain OS=Mus musculus GN=Tuba1b PE=1 SV=2	0.916	0.99883	7007.8	6420.2	3.41	21.34	6841	7178.6	7474.4	5514.7	1.04935
Q9DB77	Cytochrome b-c1 complex subunit 2, mitochondrial OS=Mus musculus GN=Uqcrc2 PE=1 SV=1	0.916	0.99883	552.8	506.4	2.95	29.28	564.4	541.4	624.8	410.5	0.959249
G5E895	Aldo-keto reductase family 1, member B10 (aldose reductase) OS=Mus musculus GN=Akr1b10 PE=1 SV=1	0.915	0.99883	522.3	478.1	14.44	41.77	578.7	471.4	648.3	352.6	0.814584
P61979	Heterogeneous nuclear ribonucleoprotein K OS=Mus musculus GN=Hnrnpk PE=1 SV=1	0.914	0.99883	3026.2	2766.9	3.35	27.3	2955.3	3098.9	3364.2	2275.7	1.04859
B9EHN0	Ubiquitin-activating enzyme E1, Chr X OS=Mus musculus GN=Uba1 PE=1 SV=1	0.913	0.99883	700.3	639.2	17.43	21.34	618.7	792.6	744.2	549	1.28107
O09061	Proteasome subunit beta type-1 OS=Mus musculus GN=Psmb1 PE=1 SV=1	0.912	0.99883	172.5	157.4	1.97	10.46	174.9	170.1	169.5	146.2	0.972556
Q7M6Y3	Phosphatidylinositol-binding clathrin assembly protein OS=Mus musculus GN=Picalm PE=1 SV=1	0.909	0.99883	138.9	126.2	18.22	20.92	158.1	122	146.5	108.7	0.771664
Q80Y52	Heat shock protein 90, alpha (Cytosolic), class A member 1 OS=Mus musculus GN=Hsp90aa1 PE=1 SV=2	0.907	0.99883	101.1	91.7	0.83	3.9	100.5	101.7	94.3	89.2	1.01194
P51881	ADP/ATP translocase 2 OS=Mus musculus GN=Slc25a5 PE=1 SV=3	0.907	0.99883	2035.1	1845.3	1.82	57.61	2061.4	2009.1	2843.8	1197.4	0.974629
Q8VED9	Galectin-related protein OS=Mus musculus GN=Lgalsl PE=1 SV=1	0.906	0.99883	144.8	131.2	6.2	26.93	151.3	138.6	108.2	159.1	0.916061
Q5BLK0	MCG18564, isoform CRA_a OS=Mus musculus GN=Rpl12 PE=1 SV=1	0.905	0.99883	208.7	188.9	8.49	15.72	196.5	221.6	211.2	169	1.12774
Q642L7	MCG13441 OS=Mus musculus GN=Rps27a PE=2 SV=1	0.905	0.99883	16784.1	15196.4	9.77	7.49	17986.2	15662.4	16023.7	14411.9	0.870801
P68510	14-3-3 protein eta OS=Mus musculus GN=Ywhah PE=1 SV=2	0.905	0.99883	291.5	263.7	23.89	28.55	345.7	245.8	323.6	214.9	0.711021
P62196	26S proteasome regulatory subunit 8 OS=Mus musculus GN=Psmc5 PE=1 SV=1	0.904	0.99883	183	165.5	2.63	7.24	186.4	179.6	157.2	174.2	0.963519
Q32P04	Keratin 5 OS=Mus musculus GN=Krt5 PE=1 SV=2	0.904	0.99883	24644	22277.5	5.66	1.72	25650.4	23677	22008.2	22550	0.923066
Q78PY7	Staphylococcal nuclease domain-containing protein 1 OS=Mus musculus GN=Snd1 PE=1 SV=1	0.903	0.99883	269.4	243.2	6.55	5.05	282.2	257.2	234.7	252.1	0.91141
Q9DCD0	6-phosphogluconate dehydrogenase, decarboxylating OS=Mus musculus GN=Pgd PE=1 SV=3	0.901	0.99883	542.1	488.6	20.11	30.12	625.5	469.8	606.6	393.6	0.751079
Q61207	Prosaposin OS=Mus musculus GN=Psap PE=1 SV=2	0.9	0.99883	516.3	464.6	26.46	58.08	427.2	623.9	718.8	300.3	1.46044
P08249	Malate dehydrogenase, mitochondrial OS=Mus musculus GN=Mdh2 PE=1 SV=3	0.9	0.99883	1792.9	1613.4	6.38	13.45	1713.7	1875.7	1774.9	1466.6	1.09453
Q3ULF7	MCG1196 OS=Mus musculus GN=Actr3 PE=1 SV=1	0.9	0.99883	531.3	478.4	6.86	21.3	557.8	506.2	556.8	411	0.907494
P35550	rRNA 2'-O-methyltransferase fibrillarin OS=Mus musculus GN=Fbl PE=1 SV=2	0.899	0.99883	564.6	507.3	9.78	6.56	526.8	605	531.4	484.3	1.14844
Q3U0V1	Far upstream element-binding protein 2 OS=Mus musculus GN=Khsrp PE=1 SV=2	0.898	0.99883	340.7	306	2.04	4.28	345.6	335.8	315.4	296.9	0.971644
Q0PD65	RAB2, member RAS oncogene family OS=Mus musculus GN=Rab2a PE=1 SV=1	0.898	0.99883	44.4	39.9	12.37	23.12	48.5	40.7	47	33.8	0.839175
P47753	F-actin-capping protein subunit alpha-1 OS=Mus musculus GN=Capza1 PE=1 SV=4	0.896	0.99883	677.5	607.3	0.11	14.68	677	678.1	674	547.2	1.00162
P45952	Medium-chain specific acyl-CoA dehydrogenase, mitochondrial OS=Mus musculus GN=Acadm PE=1 SV=1	0.896	0.99883	122.4	109.7	4.63	29.64	126.5	118.4	135.7	88.7	0.935968
Q6ZWX1	MCG1036414 OS=Mus musculus GN=Rpl35a PE=1 SV=1	0.895	0.99883	673.6	602.8	18.22	36.18	591.8	766.8	783	464	1.29571
Q91VC3	Eukaryotic initiation factor 4A-III OS=Mus musculus GN=Eif4a3 PE=1 SV=3	0.895	0.99883	266.8	238.7	9.94	33.12	286.2	248.6	303	188	0.868623
Q7TMM9	Tubulin beta-2A chain OS=Mus musculus GN=Tubb2a PE=1 SV=1	0.893	0.99883	104.9	93.8	4.89	30.93	108.6	101.4	117.1	75.1	0.933702
Q9DCY1	Peptidyl-prolyl cis-trans isomerase OS=Mus musculus GN=Ppib PE=1 SV=1	0.891	0.99883	804.3	716.8	10.68	53.11	745.7	867.6	1063.8	482.9	1.16347
Q61316	Heat shock 70 kDa protein 4 OS=Mus musculus GN=Hspa4 PE=1 SV=1	0.89	0.99883	243.4	216.7	16.13	12.51	217.1	272.9	236.8	198.3	1.25702
Q9Z2U0	Proteasome subunit alpha type-7 OS=Mus musculus GN=Psma7 PE=1 SV=1	0.89	0.99883	118	105	0.84	29.41	117.3	118.7	129.7	85	1.01194
Q9D8N0	Elongation factor 1-gamma OS=Mus musculus GN=Eef1g PE=1 SV=3	0.889	0.99883	539.3	479.6	8.54	29.37	573	507.7	592.1	388.5	0.886038
Q68FL6	Methionine--tRNA ligase, cytoplasmic OS=Mus musculus GN=Mars PE=1 SV=1	0.889	0.99883	69.8	62	9.51	6.02	74.6	65.2	64.7	59.4	0.873995
Q91ZR2	Sorting nexin-18 OS=Mus musculus GN=Snx18 PE=1 SV=1	0.888	0.99883	138.8	123.2	15.77	9.45	124.1	155.2	131.7	115.2	1.2506
Q9R190	Metastasis-associated protein MTA2 OS=Mus musculus GN=Mta2 PE=1 SV=1	0.888	0.99883	204.7	181.7	2.46	0.73	201.2	208.3	180.8	182.7	1.03529
P47757-4	Isoform 3 of F-actin-capping protein subunit beta OS=Mus musculus GN=Capzb	0.886	0.99883	1231.3	1090.8	3.28	33.21	1260.3	1203.1	1385.7	858.7	0.954614
Q6ZQ08	CCR4-NOT transcription complex subunit 1 OS=Mus musculus GN=Cnot1 PE=1 SV=2	0.885	0.99883	57.7	51.1	2.54	10.2	58.8	56.7	47.5	54.9	0.964286
P29341	Polyadenylate-binding protein 1 OS=Mus musculus GN=Pabpc1 PE=1 SV=2	0.882	0.99883	149.8	132.1	3.32	11.04	146.3	153.3	142.8	122.1	1.04785
Q3UCD9	Cathepsin D, isoform CRA_a OS=Mus musculus GN=Ctsd PE=1 SV=1	0.877	0.99883	630.6	552.7	2.24	72.23	620.7	640.6	971.2	314.5	1.03206
Q61206	Platelet-activating factor acetylhydrolase IB subunit beta OS=Mus musculus GN=Pafah1b2 PE=1 SV=2	0.876	0.99883	319.8	280.1	9.81	29.54	342.8	298.3	346.2	226.6	0.870187
Q60749	KH domain-containing, RNA-binding, signal transduction-associated protein 1 OS=Mus musculus GN=Khdrbs1 PE=1 SV=2	0.875	0.99883	268.4	234.8	17.58	16.99	236.9	304.1	264.9	208.1	1.28366
A3KML3	MCG126220 OS=Mus musculus GN=Ywhaq PE=2 SV=1	0.875	0.99883	585.7	512.4	0.98	27.71	581.6	589.7	624.9	420.1	1.01393
Q545K5	MCG116386, isoform CRA_a OS=Mus musculus GN=Rbm3 PE=1 SV=1	0.873	0.99883	147.3	128.6	40.2	13.74	110	197.3	141.8	116.7	1.79364
Q91ZJ5	UTP--glucose-1-phosphate uridylyltransferase OS=Mus musculus GN=Ugp2 PE=1 SV=3	0.872	0.99883	101.6	88.6	2.95	7.99	103.7	99.5	93.7	83.7	0.959499
P17742	Peptidyl-prolyl cis-trans isomerase A OS=Mus musculus GN=Ppia PE=1 SV=2	0.871	0.99883	2673.8	2330.2	5.48	68.3	2572.2	2779.4	3946.3	1375.9	1.08055
Q5SX53	Putative uncharacterized protein OS=Mus musculus GN=Slc25a11 PE=1 SV=1	0.871	0.99883	308	268.2	7.6	31.78	325	291.9	337.1	213.4	0.898154
O88935	Synapsin-1 OS=Mus musculus GN=Syn1 PE=1 SV=2	0.87	0.99883	145.4	126.5	15.64	9.23	130.1	162.4	118.5	135	1.24827
Q64727	Vinculin OS=Mus musculus GN=Vcl PE=1 SV=4	0.87	0.99883	830.5	722.5	2.21	3.99	843.6	817.6	743.2	702.5	0.96918
P22437	Prostaglandin G/H synthase 1 OS=Mus musculus GN=Ptgs1 PE=1 SV=1	0.869	0.99883	832	722.8	0.33	8.43	830.1	834	767.2	680.9	1.0047
P13020	Gelsolin OS=Mus musculus GN=Gsn PE=1 SV=3	0.868	0.99883	2101.1	1824.2	5.88	1.06	2015.5	2190.3	1810.5	1838	1.08673
P42669	Transcriptional activator protein Pur-alpha OS=Mus musculus GN=Pura PE=1 SV=1	0.866	0.99883	372.1	322.2	2.85	20.48	364.7	379.7	372.8	278.5	1.04113
Q8BYI6	Lysophosphatidylcholine acyltransferase 2 OS=Mus musculus GN=Lpcat2 PE=1 SV=1	0.866	0.99883	506.5	438.8	7.22	1.43	533	481.3	443.3	434.4	0.903002
Q5M8R8	60S acidic ribosomal protein P0 OS=Mus musculus GN=Rplp0 PE=2 SV=1	0.86	0.99883	807	693.9	2.59	46.89	792.3	821.9	979.4	491.7	1.03736
Q561N5	MCG23000, isoform CRA_b OS=Mus musculus GN=Rps18 PE=2 SV=1	0.859	0.99883	649.9	558.6	11.89	5.86	597.4	707	582.2	535.9	1.18346
P26883	Peptidyl-prolyl cis-trans isomerase FKBP1A OS=Mus musculus GN=Fkbp1a PE=1 SV=2	0.859	0.99883	535.9	460.1	3.6	21.68	549.7	522.4	537	394.3	0.950337
G5E924	Heterogeneous nuclear ribonucleoprotein L (Fragment) OS=Mus musculus GN=Hnrnpl PE=1 SV=1	0.856	0.99883	835.7	715	11.34	22.6	771.2	905.6	840.1	608.6	1.17427
Q8R0W0	Epiplakin OS=Mus musculus GN=Eppk1 PE=1 SV=2	0.856	0.99883	214.3	183.5	10.9	34.19	231.5	198.4	143.4	234.8	0.857019
P09411	Phosphoglycerate kinase 1 OS=Mus musculus GN=Pgk1 PE=1 SV=4	0.855	0.99883	379.3	324.4	3.86	17.64	389.8	369.1	367.8	286.2	0.946896
Q542X7	Chaperonin subunit 2 (Beta), isoform CRA_a OS=Mus musculus GN=Cct2 PE=1 SV=1	0.855	0.99883	501.9	429.4	12.59	3.16	548.8	459.1	439.1	419.9	0.836552
P16125	L-lactate dehydrogenase B chain OS=Mus musculus GN=Ldhb PE=1 SV=2	0.852	0.99883	258.5	220.2	7.38	55.48	272.3	245.3	333.3	145.5	0.900845
P02535	Keratin, type I cytoskeletal 10 OS=Mus musculus GN=Krt10 PE=1 SV=3	0.852	0.99883	43555.5	37087.7	8.95	20.5	46403.5	40882.3	32049.7	42917.6	0.881018
Q3TBT3	Stimulator of interferon genes protein OS=Mus musculus GN=Tmem173 PE=1 SV=2	0.85	0.99883	269.8	229.2	2.82	1.7	275.3	264.5	226.5	232	0.96077
P47811	Mitogen-activated protein kinase 14 OS=Mus musculus GN=Mapk14 PE=1 SV=3	0.85	0.99883	67.7	57.6	17.08	28.1	76.5	60	70.4	47.1	0.784314
Q9Z2X1	Heterogeneous nuclear ribonucleoprotein F OS=Mus musculus GN=Hnrnpf PE=1 SV=3	0.848	0.99883	464.4	393.7	18.94	15.1	405.9	531.4	438.2	353.7	1.30919
Q99JY0	Trifunctional enzyme subunit beta, mitochondrial OS=Mus musculus GN=Hadhb PE=1 SV=1	0.848	0.99883	109.6	92.9	1.64	46.82	108.3	110.9	131.1	65.9	1.02401
Q9D646	Keratin, type I cuticular Ha4 OS=Mus musculus GN=Krt34 PE=2 SV=1	0.845	0.99883	1309.8	1106.2	28.03	24.08	1071.4	1601.1	931.4	1313.8	1.4944
P08228	Superoxide dismutase [Cu-Zn] OS=Mus musculus GN=Sod1 PE=1 SV=2	0.844	0.99883	277.7	234.3	41.89	43.57	204.6	376.8	322.2	170.4	1.84164
P00405	Cytochrome c oxidase subunit 2 OS=Mus musculus GN=Mtco2 PE=1 SV=1	0.844	0.99883	123.3	104	3.52	10.37	126.4	120.2	111.9	96.6	0.950949
Q9CX86	Heterogeneous nuclear ribonucleoprotein A0 OS=Mus musculus GN=Hnrnpa0 PE=1 SV=1	0.843	0.99883	102.4	86.2	13.35	5.23	93.1	112.5	89.5	83.1	1.20838
P99026	Proteasome subunit beta type-4 OS=Mus musculus GN=Psmb4 PE=1 SV=1	0.843	0.99883	807.5	680.4	3.72	14.07	786.5	829	751.8	615.7	1.05404
Q9Z1X4	Interleukin enhancer-binding factor 3 OS=Mus musculus GN=Ilf3 PE=1 SV=2	0.841	0.99883	99.3	83.5	8.76	14.87	93.3	105.6	75.1	92.8	1.13183
Q3U6J9	Palmitoyl-protein thioesterase 1 OS=Mus musculus GN=Ppt1 PE=1 SV=1	0.841	0.99883	1168.9	983.2	6.9	40.42	1227.4	1113.2	1319.2	732.7	0.906958
P61255	60S ribosomal protein L26 OS=Mus musculus GN=Rpl26 PE=1 SV=1	0.84	0.99883	641.8	539.3	4.29	21.42	622.6	661.6	628.3	463	1.06264
Q61704	Inter-alpha-trypsin inhibitor heavy chain H3 OS=Mus musculus GN=Itih3 PE=1 SV=3	0.839	0.99883	715.9	600.7	12.62	18.94	654.6	782.9	687.4	525	1.196
P56480	ATP synthase subunit beta, mitochondrial OS=Mus musculus GN=Atp5b PE=1 SV=2	0.839	0.99883	1459.4	1224.9	0.31	26.4	1456.2	1462.5	1479.6	1014.1	1.00433
Q32MD7	Regulator of G-protein signalling 10 OS=Mus musculus GN=Rgs10 PE=1 SV=1	0.837	0.99883	226.7	189.7	0.71	48.41	225.6	227.9	271	132.8	1.0102
Q9Z1N5	Spliceosome RNA helicase Ddx39b OS=Mus musculus GN=Ddx39b PE=1 SV=1	0.834	0.99883	865.2	721.9	15.13	34.19	963.3	777.1	923.8	564.1	0.806706
Q9Z204-2	Isoform C1 of Heterogeneous nuclear ribonucleoproteins C1/C2 OS=Mus musculus GN=Hnrnpc	0.833	0.99883	253.6	211.3	7.68	14.41	240.1	267.7	234	190.7	1.11495
P70429	Ena/VASP-like protein OS=Mus musculus GN=Evl PE=1 SV=2	0.833	0.99883	183.3	152.7	6.25	4.21	191.6	175.4	157.3	148.2	0.915449
Q544Z7	DNA-(apurinic or apyrimidinic site) lyase OS=Mus musculus GN=Apex1 PE=1 SV=1	0.829	0.99883	407.9	338	22.24	47.23	478	348.1	478.3	238.8	0.728243
Q8C570	mRNA export factor OS=Mus musculus GN=Rae1 PE=1 SV=1	0.828	0.99883	79.5	65.8	1.23	6.3	78.8	80.2	68.8	62.9	1.01777
Q61029	Lamina-associated polypeptide 2, isoforms beta/delta/epsilon/gamma OS=Mus musculus GN=Tmpo PE=1 SV=4	0.827	0.99883	87.9	72.7	13.7	27.62	79.8	96.9	88.6	59.6	1.21429
Q62087	Serum paraoxonase/lactonase 3 OS=Mus musculus GN=Pon3 PE=1 SV=2	0.823	0.99883	395.4	325.2	15	35.04	439.8	355.5	418.9	252.5	0.808322
Q9CQV8	14-3-3 protein beta/alpha OS=Mus musculus GN=Ywhab PE=1 SV=3	0.822	0.99883	559.7	459.9	2.85	23.6	548.6	571.1	544.3	388.6	1.04101
Q561N4	MCG1032217 OS=Mus musculus GN=Ube2l3 PE=1 SV=1	0.82	0.99883	268.8	220.4	23.57	53.61	318	227.2	328.4	147.9	0.714465
P04370	Myelin basic protein OS=Mus musculus GN=Mbp PE=1 SV=2	0.819	0.99883	279.9	229.2	19.07	10.44	244.4	320.6	212.9	246.9	1.31178
Q6IFX2	Keratin, type I cytoskeletal 42 OS=Mus musculus GN=Krt42 PE=1 SV=1	0.819	0.99883	14542	11912.9	12.83	9.76	15926.9	13277.6	12765.3	11117.4	0.833659
Q9JIF7	Coatomer subunit beta OS=Mus musculus GN=Copb1 PE=1 SV=1	0.818	0.99883	103.1	84.4	31.17	40.07	129	82.4	112.9	63	0.63876
Q564E5	Putative uncharacterized protein OS=Mus musculus GN=Eif4h PE=2 SV=1	0.816	0.99883	136.8	111.6	17.48	1.43	120.8	154.8	112.7	110.4	1.28146
O08553	Dihydropyrimidinase-related protein 2 OS=Mus musculus GN=Dpysl2 PE=1 SV=2	0.813	0.99883	2029	1648.9	4.94	49	1959.3	2101.2	2366.9	1148.8	1.07242
Q3SYP5	Keratin 16 OS=Mus musculus GN=Krt16 PE=1 SV=1	0.813	0.99883	7262.7	5906.9	15.61	7.49	8114.2	6500.6	5601.8	6228.6	0.801139
Q3TX57	Procollagen, type I, alpha 2 OS=Mus musculus GN=Col1a2 PE=1 SV=1	0.812	0.99883	1144.7	929.2	3.97	15.56	1113	1177.2	832	1037.6	1.05768
Q3U5I2	Putative uncharacterized protein OS=Mus musculus GN=Ptbp1 PE=2 SV=1	0.811	0.99883	213.5	173.3	1.97	31.74	216.5	210.6	217.7	137.9	0.972748
Q6IFZ6	Keratin, type II cytoskeletal 1b OS=Mus musculus GN=Krt77 PE=1 SV=1	0.811	0.99883	4396.5	3563.7	22.24	17.29	5152	3751.8	3151.7	4029.5	0.728222
P49312	Heterogeneous nuclear ribonucleoprotein A1 OS=Mus musculus GN=Hnrnpa1 PE=1 SV=2	0.81	0.99883	713.3	577.6	19.7	25.59	620	820.7	693.5	481	1.32371
P19157	Glutathione S-transferase P 1 OS=Mus musculus GN=Gstp1 PE=1 SV=2	0.81	0.99883	574.9	465.5	2.84	18.09	563.4	586.5	529.4	409.3	1.041
Q99KF1	Transmembrane emp24 domain-containing protein 9 OS=Mus musculus GN=Tmed9 PE=1 SV=2	0.808	0.99883	114	92.1	16.88	11.15	128.6	101.1	85.1	99.7	0.786159
O35639	Annexin A3 OS=Mus musculus GN=Anxa3 PE=1 SV=4	0.807	0.99883	1840.5	1485.5	2.85	44.55	1878.1	1803.8	2058.3	1072.1	0.960439
Q9WV54	Acid ceramidase OS=Mus musculus GN=Asah1 PE=1 SV=1	0.807	0.99883	2619.8	2113.5	6.13	31.21	2735.8	2508.6	2645	1688.7	0.916953
P11276	Fibronectin OS=Mus musculus GN=Fn1 PE=1 SV=4	0.806	0.99883	712.2	574.1	0.26	2.12	713.6	710.9	582.8	565.6	0.996216
P47963	60S ribosomal protein L13 OS=Mus musculus GN=Rpl13 PE=1 SV=3	0.804	0.99883	180.2	144.9	0.14	14.35	180	180.3	160.4	130.9	1.00167
Q544Z9	Cytochrome b-5, isoform CRA_d OS=Mus musculus GN=Cyb5a PE=1 SV=1	0.804	0.99883	73.8	59.3	22	15.68	86.3	63.1	66.3	53.1	0.73117
Q546G4	Albumin 1 OS=Mus musculus GN=Alb PE=1 SV=1	0.802	0.99883	1490.7	1196	3.17	14.24	1457.6	1524.5	1081.1	1323.2	1.0459
Q3V235	Prohibitin 2 OS=Mus musculus GN=Phb2 PE=1 SV=1	0.801	0.99883	233.8	187.2	6.01	34.63	244	224.1	240.4	145.8	0.918443
P23492	Purine nucleoside phosphorylase OS=Mus musculus GN=Pnp PE=1 SV=2	0.801	0.99883	319.5	255.8	10.52	14.71	344.2	296.5	283.9	230.4	0.861418
Q9QZQ8	Core histone macro-H2A.1 OS=Mus musculus GN=H2afy PE=1 SV=3	0.8	0.99883	1565.3	1252.6	10.86	22.91	1690.4	1449.4	1475.1	1063.7	0.85743
E9QNN1	ATP-dependent RNA helicase A OS=Mus musculus GN=Dhx9 PE=1 SV=1	0.799	0.99883	848.6	678.2	3.85	10.99	872.1	825.8	733.1	627.4	0.94691
D3Z3N4	Heterogeneous nuclear ribonucleoprotein H3 OS=Mus musculus GN=Hnrnph3 PE=1 SV=1	0.799	0.99883	475.8	380	6.18	11.83	497	455.4	413.3	349.5	0.916298
Q63844	Mitogen-activated protein kinase 3 OS=Mus musculus GN=Mapk3 PE=1 SV=5	0.796	0.99883	267.7	213.2	5.61	12.47	278.5	257.3	232.9	195.1	0.923878
Q9Z2T6	Keratin, type II cuticular Hb5 OS=Mus musculus GN=Krt85 PE=1 SV=2	0.794	0.99883	1029.8	818	1.68	13.62	1017.6	1042.1	901	742.7	1.02408
O35114	Lysosome membrane protein 2 OS=Mus musculus GN=Scarb2 PE=1 SV=3	0.792	0.99883	287.6	227.9	7.83	32.31	272.1	304	287.6	180.6	1.11724
Q9CWJ9	Bifunctional purine biosynthesis protein PURH OS=Mus musculus GN=Atic PE=1 SV=2	0.792	0.99883	197.6	156.5	1.24	18.54	195.8	199.3	178.6	137.2	1.01788
P17710	Hexokinase-1 OS=Mus musculus GN=Hk1 PE=1 SV=3	0.792	0.99883	291.3	230.8	8.3	35.04	309	274.7	297.2	179.2	0.888997
Q8VCT3	Aminopeptidase B OS=Mus musculus GN=Rnpep PE=1 SV=2	0.79	0.99883	110.3	87.1	6.12	6.64	115.2	105.6	91.3	83.1	0.916667
Q56A15	Cytochrome c OS=Mus musculus GN=Cycs PE=1 SV=1	0.789	0.99883	128.5	101.3	25.28	48.11	107.2	153.9	144.4	71.1	1.43563
P68033	Actin, alpha cardiac muscle 1 OS=Mus musculus GN=Actc1 PE=1 SV=1	0.789	0.99883	561	442.4	14.3	2.46	506.9	620.9	434.8	450.2	1.2249
P0DP28	Calmodulin-3 OS=Mus musculus GN=Calm3 PE=1 SV=1	0.784	0.99883	325.5	255	5.19	11.45	313.8	337.7	276.6	235.2	1.07616
P51660	Peroxisomal multifunctional enzyme type 2 OS=Mus musculus GN=Hsd17b4 PE=1 SV=3	0.784	0.99883	345.9	271	3.87	4.46	336.5	355.5	279.7	262.6	1.05646
O70200	Allograft inflammatory factor 1 OS=Mus musculus GN=Aif1 PE=1 SV=1	0.782	0.99883	176.8	138.2	4.83	20.03	182.9	170.9	159.4	119.9	0.93439
P11087	Collagen alpha-1(I) chain OS=Mus musculus GN=Col1a1 PE=1 SV=4	0.781	0.99883	1672.6	1306.9	10	7.33	1558.2	1795.3	1240.8	1376.5	1.15216
Q91ZX7	Prolow-density lipoprotein receptor-related protein 1 OS=Mus musculus GN=Lrp1 PE=1 SV=1	0.781	0.99883	260.8	203.7	6.28	6.86	272.6	249.5	213.8	194	0.91526
Q9EST1	Gasdermin-A OS=Mus musculus GN=Gsdma PE=2 SV=1	0.779	0.99883	264.7	206.3	22.41	2.41	310.6	225.6	209.9	202.9	0.726336
Q9DCH4	Eukaryotic translation initiation factor 3 subunit F OS=Mus musculus GN=Eif3f PE=1 SV=2	0.779	0.99883	133.8	104.3	22.57	2.08	157.2	113.9	105.8	102.7	0.724555
P51150	Ras-related protein Rab-7a OS=Mus musculus GN=Rab7a PE=1 SV=2	0.778	0.99883	119.3	92.8	8.53	35.13	126.7	112.3	119.6	72	0.886346
P48999	Arachidonate 5-lipoxygenase OS=Mus musculus GN=Alox5 PE=1 SV=3	0.775	0.99883	263.3	204.1	14.87	25.12	292.6	236.9	244.2	170.5	0.809638
P24270	Catalase OS=Mus musculus GN=Cat PE=1 SV=4	0.772	0.99883	976.8	754.5	5.78	8.61	1017.6	937.6	709.9	801.9	0.921384
Q7TPR4	Alpha-actinin-1 OS=Mus musculus GN=Actn1 PE=1 SV=1	0.771	0.99883	112.6	86.9	5.6	10.11	117.2	108.3	93.3	80.8	0.924061
Q501J6	Probable ATP-dependent RNA helicase DDX17 OS=Mus musculus GN=Ddx17 PE=1 SV=1	0.771	0.99883	355.2	273.9	7.46	20.97	374.5	337	318	235.9	0.899866
P99024	Tubulin beta-5 chain OS=Mus musculus GN=Tubb5 PE=1 SV=1	0.769	0.99883	1186.2	912.4	2.46	49.08	1207	1165.7	1310.4	635.2	0.965783
Q5BLJ9	60S ribosomal protein L27 OS=Mus musculus GN=Rpl27 PE=1 SV=1	0.769	0.99883	104.6	80.5	23	47.17	123.3	88.8	113.9	56.9	0.720195
Q8K1B8	Fermitin family homolog 3 OS=Mus musculus GN=Fermt3 PE=1 SV=1	0.768	0.99883	389.6	299.3	14.09	20.66	430.5	352.5	346.7	258.3	0.818815
Q3TM70	EH-domain containing 4 OS=Mus musculus GN=Ehd4 PE=1 SV=1	0.765	0.99883	360.1	275.5	22.13	31.22	421.7	307.6	344.8	220.1	0.729429
P62827	GTP-binding nuclear protein Ran OS=Mus musculus GN=Ran PE=1 SV=3	0.763	0.99883	265.4	202.6	6.38	23.36	253.7	277.7	239.3	171.4	1.0946
Q9CZ13	Cytochrome b-c1 complex subunit 1, mitochondrial OS=Mus musculus GN=Uqcrc1 PE=1 SV=2	0.762	0.99883	509	387.8	1.23	14.89	513.4	504.6	431	348.9	0.982859
P08071	Lactotransferrin OS=Mus musculus GN=Ltf PE=1 SV=4	0.762	0.99883	1685.3	1284.1	25.57	6.77	2023.5	1403.7	1347.1	1224.1	0.693699
Q8BHD7	Polypyrimidine tract-binding protein 3 OS=Mus musculus GN=Ptbp3 PE=1 SV=1	0.761	0.99883	144.5	110	0.28	32.47	144.2	144.8	139	87.1	1.00416
P11247	Myeloperoxidase OS=Mus musculus GN=Mpo PE=1 SV=2	0.761	0.99883	299.9	228.1	8.01	5.32	317.4	283.4	219.7	236.9	0.89288
Q3UP42	Putative uncharacterized protein OS=Mus musculus GN=S100a9 PE=1 SV=1	0.76	0.99883	1241.8	944.2	12.44	3.17	1356.3	1136.9	965.6	923.2	0.838236
Q3UY68	Calcium/calmodulin-dependent protein kinase I OS=Mus musculus GN=Camk1 PE=1 SV=1	0.759	0.997935	104	78.9	19.54	47.15	119.5	90.5	111.6	55.8	0.757322
Q9QUM9	Proteasome subunit alpha type-6 OS=Mus musculus GN=Psma6 PE=1 SV=1	0.757	0.997935	134	101.5	13.04	23.62	146.9	122.1	120.1	85.7	0.831178
Q61878	Bone marrow proteoglycan OS=Mus musculus GN=Prg2 PE=1 SV=1	0.756	0.995377	287.7	217.4	16.57	7.43	255.8	323.7	206.3	229.2	1.26544
Q04447	Creatine kinase B-type OS=Mus musculus GN=Ckb PE=1 SV=1	0.752	0.980955	1245.4	936.2	1.88	28.31	1229	1262	1146.9	764.3	1.02685
Q8BTM8	Filamin-A OS=Mus musculus GN=Flna PE=1 SV=5	0.749	0.965562	344.2	257.9	4.06	6.28	354.3	334.5	246.7	269.6	0.944115
P27661	Histone H2AX OS=Mus musculus GN=H2afx PE=1 SV=2	0.743	0.954649	33	24.5	6.27	90.69	34.5	31.5	52.4	11.5	0.913043
Q9DCN2	NADH-cytochrome b5 reductase 3 OS=Mus musculus GN=Cyb5r3 PE=1 SV=3	0.74	0.935896	68.4	50.7	26.33	29.3	82.6	56.7	62.5	41	0.686441
P40142	Transketolase OS=Mus musculus GN=Tkt PE=1 SV=1	0.739	0.935896	185.1	136.8	21.94	34.59	216.4	158.3	175.6	106.6	0.731516
P35441	Thrombospondin-1 OS=Mus musculus GN=Thbs1 PE=1 SV=1	0.738	0.935896	237.9	175.5	2.98	34.44	232.9	242.9	225	136.9	1.04294
P01027	Complement C3 OS=Mus musculus GN=C3 PE=1 SV=3	0.737	0.935896	1920.5	1414.5	4.77	33.11	1856.7	1986.5	1795.5	1114.3	1.06991
Q5M9K9	MCG126194, isoform CRA_a OS=Mus musculus GN=Rpl31 PE=1 SV=1	0.734	0.935896	444.5	326.3	0.29	9.64	443.6	445.5	349.4	304.8	1.00428
Q07417	Short-chain specific acyl-CoA dehydrogenase, mitochondrial OS=Mus musculus GN=Acads PE=1 SV=2	0.731	0.935896	386.3	282.4	6.54	21.53	368.8	404.5	329.2	242.2	1.0968
P61164	Alpha-centractin OS=Mus musculus GN=Actr1a PE=1 SV=1	0.73	0.932356	64.2	46.9	7.09	20.17	67.5	61.1	54.1	40.6	0.905185
A8DUK4	Beta-globin OS=Mus musculus GN=Hbbt1 PE=1 SV=1	0.728	0.919464	387.2	281.8	17.05	14.26	437.1	343	311.8	254.7	0.784717
O35381	Acidic leucine-rich nuclear phosphoprotein 32 family member A OS=Mus musculus GN=Anp32a PE=1 SV=1	0.725	0.918098	321.2	232.9	9.47	65.67	343.4	300.3	385	140.8	0.87449
P63001	Ras-related C3 botulinum toxin substrate 1 OS=Mus musculus GN=Rac1 PE=1 SV=1	0.721	0.89977	190.9	137.6	9	45.7	203.5	179.2	192.4	98.4	0.88059
P46460	Vesicle-fusing ATPase OS=Mus musculus GN=Nsf PE=1 SV=2	0.718	0.889381	406.3	291.7	35.41	10.8	524.7	314.6	314.9	270.2	0.599581
Q9Z320	Keratin, type I cytoskeletal 27 OS=Mus musculus GN=Krt27 PE=1 SV=1	0.717	0.884169	356.5	255.7	0.72	31.34	354.7	358.3	204.1	320.3	1.01015
Q8BGQ7	Alanine--tRNA ligase, cytoplasmic OS=Mus musculus GN=Aars PE=1 SV=1	0.717	0.884169	130.8	93.8	1.08	21.07	131.8	129.8	109	80.7	0.984825
Q61703	Inter-alpha-trypsin inhibitor heavy chain H2 OS=Mus musculus GN=Itih2 PE=1 SV=1	0.715	0.879125	4036.4	2884.1	2.27	54.93	4101.8	3972	4345.5	1914.2	0.968355
Q8BH97	Reticulocalbin-3 OS=Mus musculus GN=Rcn3 PE=1 SV=1	0.714	0.879125	240.6	171.8	3.21	3.32	235.2	246.1	175.9	167.8	1.04634
Q00623	Apolipoprotein A-I OS=Mus musculus GN=Apoa1 PE=1 SV=2	0.708	0.850707	1994.6	1411.4	27.12	68.79	1642.6	2422.1	2401.1	829.7	1.47455
Q93092	Transaldolase OS=Mus musculus GN=Taldo1 PE=1 SV=2	0.704	0.840043	1757.6	1236.7	12.79	50	1924.5	1605.2	1789.5	854.6	0.834087
P62274	40S ribosomal protein S29 OS=Mus musculus GN=Rps29 PE=3 SV=2	0.703	0.834705	78.1	54.9	8.77	40.69	73.4	83.1	73.8	40.8	1.13215
Q921M7	Protein FAM49B OS=Mus musculus GN=Fam49b PE=1 SV=1	0.696	0.800569	498	346.5	17.68	8.03	564.6	439.2	366.8	327.4	0.777896
Q3U1J4	DNA damage-binding protein 1 OS=Mus musculus GN=Ddb1 PE=1 SV=2	0.688	0.766689	114.1	78.5	27.25	5.56	138.7	93.9	81.7	75.5	0.677001
B2RVP5	Histone H2A OS=Mus musculus GN=H2afv PE=2 SV=1	0.68	0.726259	1316.5	895.6	13.16	76.9	1199.2	1445.3	1647.4	486.9	1.20522
Q08879	Fibulin-1 OS=Mus musculus GN=Fbln1 PE=1 SV=2	0.679	0.726259	3412.5	2318.6	17.88	35.79	3875.1	3005.2	3003.2	1790	0.775515
Q4FZE6	Putative uncharacterized protein OS=Mus musculus GN=Rps7 PE=2 SV=1	0.677	0.715993	365.3	247.3	0.35	51.98	366.2	364.4	363.6	168.2	0.995085
B2RWH3	Histone H2A OS=Mus musculus GN=Hist2h2aa1 PE=2 SV=1	0.676	0.708539	1566.5	1058.6	1.62	100.84	1584.5	1548.7	2586.5	433.3	0.977406
P63038	60 kDa heat shock protein, mitochondrial OS=Mus musculus GN=Hspd1 PE=1 SV=1	0.674	0.700879	182.1	122.7	16.57	51.51	204.8	161.8	179.8	83.8	0.790039
Q61599	Rho GDP-dissociation inhibitor 2 OS=Mus musculus GN=Arhgdib PE=1 SV=3	0.672	0.685972	235.3	158	14.56	43.4	260.9	212.2	217	115.1	0.813338
Q9R112	Sulfide:quinone oxidoreductase, mitochondrial OS=Mus musculus GN=Sqor PE=1 SV=3	0.671	0.685972	120.3	80.8	26.26	11.01	145.2	99.7	74.7	87.3	0.686639
Q61765	Keratin, type I cuticular Ha1 OS=Mus musculus GN=Krt31 PE=1 SV=2	0.67	0.683048	2224.3	1490.1	14.16	1.12	2011.8	2459.3	1478.3	1502	1.22244
P20918	Plasminogen OS=Mus musculus GN=Plg PE=1 SV=3	0.667	0.683048	288.9	192.6	19.99	51.46	333	250.5	282	131.5	0.752252
Q543J5	Antithrombin OS=Mus musculus GN=Serpinc1 PE=1 SV=1	0.662	0.670355	1569.7	1039.5	10	47.53	1685	1462.4	1474.7	732.7	0.867893
P60879	Synaptosomal-associated protein 25 OS=Mus musculus GN=Snap25 PE=1 SV=1	0.661	0.667065	622.6	411.3	34.7	5.15	484.7	799.8	426.6	396.6	1.65009
Q4FK74	ATP synthase, H+ transporting, mitochondrial F1 complex, delta subunit, isoform CRA_c OS=Mus musculus GN=Atp5d PE=1 SV=1	0.652	0.614621	349.8	228	9.84	34.62	326.3	375	292.7	177.6	1.14925
Q8BG05	Heterogeneous nuclear ribonucleoprotein A3 OS=Mus musculus GN=Hnrnpa3 PE=1 SV=1	0.643	0.543601	1563.9	1005	6.18	56.63	1497	1633.7	1535.9	657.6	1.09132
P26350	Prothymosin alpha OS=Mus musculus GN=Ptma PE=1 SV=2	0.638	0.534174	414.8	264.5	8.43	36.45	390.8	440.4	344.3	203.2	1.12692
P47877	Insulin-like growth factor-binding protein 2 OS=Mus musculus GN=Igfbp2 PE=2 SV=2	0.637	0.534174	269.5	171.7	9.92	26.67	289.2	251.2	207.8	141.9	0.868603
Q6GQT1	Alpha-2-macroglobulin-P OS=Mus musculus GN=A2m PE=2 SV=2	0.634	0.530432	3854.3	2444.8	41.73	96.12	5224.4	2843.6	5597.9	1067.7	0.544292
Q9EQU5	Protein SET OS=Mus musculus GN=Set PE=1 SV=1	0.633	0.528854	461.2	292	3.18	32.36	471.7	450.9	368.6	231.3	0.955904
P01942	Hemoglobin subunit alpha OS=Mus musculus GN=Hba PE=1 SV=2	0.633	0.528854	2242.3	1418.3	20.48	18.72	2594.4	1938.1	1620.3	1241.5	0.747032
P62307	Small nuclear ribonucleoprotein F OS=Mus musculus GN=Snrpf PE=1 SV=1	0.623	0.507895	121.1	75.5	22.66	12.83	103.1	142.4	82.7	68.9	1.38118
Q9ERE2	Keratin, type II cuticular Hb1 OS=Mus musculus GN=Krt81 PE=2 SV=2	0.622	0.500482	219.6	136.5	25.05	19.26	183.6	262.6	156.6	119.1	1.43028
P21460	Cystatin-C OS=Mus musculus GN=Cst3 PE=1 SV=2	0.608	0.428166	478.7	291.1	58.08	14.41	309.4	740.7	322.5	262.8	2.39399
Q9Z0P5	Twinfilin-2 OS=Mus musculus GN=Twf2 PE=1 SV=1	0.587	0.298919	147.2	86.4	2.57	34.55	149.9	144.5	110.9	67.4	0.963976
Q60668	Heterogeneous nuclear ribonucleoprotein D0 OS=Mus musculus GN=Hnrnpd PE=1 SV=2	0.585	0.292966	348	203.6	30.69	64.85	433.8	279.1	334.2	124.1	0.643384
Q50HX4	Putative uncharacterized protein OS=Mus musculus GN=Rab14 PE=1 SV=1	0.58	0.291839	313.1	181.7	26.17	10.87	377.6	259.7	196.3	168.3	0.687765
P10107	Annexin A1 OS=Mus musculus GN=Anxa1 PE=1 SV=2	0.568	0.265543	82.8	47.1	31.98	42.71	104.3	65.8	64.3	34.5	0.630872
Q9D2V7	Coronin-7 OS=Mus musculus GN=Coro7 PE=1 SV=2	0.552	0.205046	131.2	72.4	37.71	29.4	172.4	99.8	89.4	58.6	0.578886
Q53X15	Protein S100 OS=Mus musculus GN=S100a8 PE=1 SV=1	0.549	0.205046	95.1	52.2	54.73	94.64	143	63.2	117.3	23.2	0.441958
P51437	Cathelicidin antimicrobial peptide OS=Mus musculus GN=Camp PE=1 SV=2	0.54	0.170362	105.1	56.7	20.16	5.82	121.3	91.1	59.1	54.4	0.751031
P10853	Histone H2B type 1-F/J/L OS=Mus musculus GN=Hist1h2bf PE=1 SV=2	0.539	0.170362	1667.3	899.2	77.33	48.09	902.5	3080.2	1281.4	631	3.41296
Q9R0G6	Cartilage oligomeric matrix protein OS=Mus musculus GN=Comp PE=1 SV=2	0.539	0.170362	482.4	260.2	7.61	19.09	457.1	509.1	298	227.1	1.11376
P11679	Keratin, type II cytoskeletal 8 OS=Mus musculus GN=Krt8 PE=1 SV=4	0.539	0.170362	272.8	146.9	5.23	47.19	283	262.9	207.9	103.9	0.928975
Q921I1	Serotransferrin OS=Mus musculus GN=Tf PE=1 SV=1	0.378	0.000837166	1051.9	397.2	40.5	70.35	783.5	1412.4	685.6	230.1	1.80268
P84244	Histone H3.3 OS=Mus musculus GN=H3f3a PE=1 SV=2	0.266	9.32446e-08	39	10.4	37.33	40.97	29.8	51.1	14	7.7	1.71477

## Sheet: CD11b - LPS overlap
Overlapping proteins between CD11b+ sorted cells and the hippocampal proteome
Gene name	Acc. No
Hist1h1b	P43276
Khdrbs1	Q60749
Set	Q9EQU5
Rpl35a	O55142
Rpl7a	P12970
Cox6c	Q9CPQ1
Anxa2	P07356
Hsp90aa1	P07901
Anxa5	P48036
Acads	Q07417
Fubp1	Q91WJ8
Sri	Q6P069
Slc25a3	Q8VEM8
Rpl4	Q9D8E6
Mapk1	P63085
Blvrb	Q923D2
H2afy	Q9QZQ8
Naca	Q60817
Hsp90ab1	P11499
Npm1	Q61937
Rps19	Q9CZX8
Fus	P56959
Uqcrq	Q9CQ69
Rpl7	P14148
Flna	Q8BTM8
Cycs	P62897
Ugp2	Q91ZJ5
Lmnb1	P14733
Rab11b	P46638
Eef1g	Q9D8N0
Taldo1	Q93092
Lasp1	Q61792
Efhd2	Q9D8Y0
Glud1	P26443
Akr1b1	P45376
Cbr1	P48758
Hspa5	P20029
Psmb3	Q9R1P1
Tkt	P40142
Cfl1	P18760
Tmsb4x	P20065
Anxa6	P14824
Rpl5	P47962
Ppt1	O88531
Rpl18	P35980
Sfpq	Q8VIJ6
Hnrnpa2b1	O88569
Hadha	Q8BMS1
Rpl9	P51410
Eif4h	Q9WUK2
Nono	Q99K48
Pdia3	P27773
Hnrnpa3	Q8BG05
Tcp1	P11983
Prdx5	P99029
Hspa9	P38647
Ywhab	Q9CQV8
Rpl18a	P62717
Cyb5r3	Q9DCN2
Lmna	P48678
Pgam1	Q9DBJ1
Ppib	P24369
Cct4	P80315
P4hb	P09103
Pura	P42669
Hnrnpm	Q9D0E1
Hspd1	P63038
Pafah1b2	Q61206
Apex1	P28352
Atp6v1e1	P50518
Coro1b	Q9WUM3
Vat1	Q62465
Psme1	P97371
Lgalsl	Q8VED9
Arpc2	Q9CVB6
Hnrnpul2	Q00PI9
Asl	Q91YI0
Got1	P05201
Oxct1	Q9D0K2
Hnrnpu	Q8VEK3
Rab2a	P53994
Atp1a2	Q6PIE5
Rpsa	P14206
Pgk1	P09411
Ddx17	Q501J6
Pebp1	P70296
Nsf	P46460
Ddx39b	Q9Z1N5
Vim	P20152
Psap	Q61207
Cs	Q9CZU6
Psma6	Q9QUM9
Lmnb2	P21619
Cnot1	Q6ZQ08
Phb	P67778
Psma7	Q9Z2U0
Aldh2	P47738
Prdx1	P35700
Ctsb	P10605
Dars	Q922B2
Cox4i1	P19783
Ddx5	Q61656
Gdi2	Q61598
Aco2	Q99KI0
Ndufa9	Q9DC69
Atp5i	Q06185
Eef2	P58252
Kpnb1	P70168
Hsp90b1	P08113
Hspa4	Q61316
Tbcb	Q9D1E6
Itih3	Q61704
Pgd	Q9DCD0
Eif4a3	Q91VC3
Cmas	Q99KK2
Psmc2	P46471
Got2	P05202
Actn4	P57780
Fkbp2	P45878
Pfas	Q5SUR0
Coro1a	O89053
Psmb5	O55234
Prdx6	O08709
Ddost	O54734
Pdia6	Q922R8
Sdha	Q8K2B3
Atp5a1	Q03265
Psma2	P49722
Uqcrc1	Q9CZ13
Cltc	Q68FD5
Alb	P07724
Hadhb	Q99JY0
Idh2	P54071
Rplp0	P14869
Atic	Q9CWJ9
Fbl	P35550
Hspa8	P63017
Hk1	P17710
Ppia	P17742
Cct3	P80318
Vwa5a	Q99KC8
Aldoa	P05064
Ide	Q9JHR7
Mta2	Q9R190
Eef1d	P57776
Rnpep	Q8VCT3
Snd1	Q78PY7
Dpp3	Q99KK7
Rbmxl1	Q91VM5
Trim28	Q62318
Pabpc1	P29341
Prpf8	Q99PV0
App	P12023
Cct2	P80314
Hnrnpl	Q8R081
Arsb	P50429
Rtn3	Q9ES97
Mtco2	P00405
Capza2	P47754
Gpi	P06745
Uqcrc2	Q9DB77
Ywhaq	P68254
Uba1	Q02053
Psmb4	P99026
Lrp1	Q91ZX7
Atp5b	P56480
Psmb2	Q9R1P3
Ganab	Q8BHN3
Myh9	Q8VDD5
Hexb	P20060
Asah1	Q9WV54
Ruvbl2	Q9WTM5
Nsfl1c	Q9CZ44
Dhx9	O70133
Clta	O08585
Hnrnpd	Q60668
Plec	Q9QXS1
Rtn4	Q99P72
Acadm	P45952
Sec23a	Q01405
Hnrnpf	Q9Z2X1
Rad23b	P54728
Mars	Q68FL6
Sfxn3	Q91V61
Psmb1	O09061
Actr3	Q99JY9
Ctsd	P18242
Psmd2	Q8VDM4
Picalm	Q7M6Y3
Cyb5a	P56395
Cotl1	Q9CQI6
Anxa3	O35639
Cndp2	Q9D1A2
Ddb1	Q3U1J4
Slc9a3r1	P70441
Rpn1	Q91YQ5
Vcl	Q64727
Akr1a1	Q9JII6
Mapk3	Q63844
Hsd17b4	P51660
Slc25a5	P51881
Lap3	Q9CPY7
Ywhaz	P63101
Pkm	P52480
Psmb8	P28063
Tpi1	P17751
Actn1	Q7TPR4
Cyfip1	Q7TMB8
Ddx3x	Q62167
Psma1	Q9R1P4
Rbm14	Q8C2Q3
Sec22b	O08547
Syn1	O88935
Rpl12	P35979
Elavl1	P70372
Stx7	O70439
Atp6v1a	P50516
Ldhb	P16125
Khsrp	Q3U0V1
Copb1	Q9JIF7
Tf	Q921I1
Gpd2	Q64521
Clu	Q06890
Park7	Q99LX0
Mdh2	P08249
Pfn1	P62962
Abhd12	Q99LR1
Sh3bp1	P55194
Fam49b	Q921M7
Atp6v1b2	P62814
Ilf3	Q9Z1X4
Tpm3	P21107
Coro7	Q9D2V7
Psma3	O70435
Aars	Q8BGQ7
Slc25a11	Q9CR62
Blmh	Q8R016
Hist1h1d	P15864
Gnai2	P08752
Prdx2	Q61171
Cat	P24270
Col1a2	Q01149
Sf3b1	Q99NB9
Sod1	P08228
Rpn2	Q9DBG6
Ezr	P26040
Epdr1	Q99M71
Ckb	Q04447
Twf2	Q9Z0P5
Pfkl	P12382
Gapdh	P16858
Capza1	P47753
Arhgdia	Q99PT1
Psmb6	Q60692
Fscn1	Q61553
Eif3f	Q9DCH4
Pip4k2a	O70172
Tmpo	Q61029
Kctd12	Q6WVG3
Tln1	P26039
Gsn	P13020
Anp32a	O35381
Flnb	Q80X90
Gstp1	P19157
Gfap	P03995
Dpysl2	O08553
Hnrnpa0	Q9CX86
Hnrnpul1	Q8VDM6
Evl	P70429
Rps3a	P97351
Bag6	Q9Z1R2
Ptma	P26350
Arpc3	Q9JM76
Rpl13	P47963
Mbp	P02688
Atpif1	O35143
Prpsap2	Q8R574
Alyref	O08583
Pnp	P23492
Ctsz	Q9WUU7
Anxa4	P97429
Serbp1	Q9CY58
Atp5d	Q9D3D9
Ubqln1	Q8R317
Apoe	P08226
Jup	Q02257
Cst3	P21460
Col1a1	P11087
Sh3bgrl3	Q91VW3
Rbm3	O89086
Hba	P01942
